# Supplementary material
Source: PubMed Central journal article supplement (PMC2653091)
Supplement: NIHMS91312-supplement-1_si_001.pdf [file NIHMS91312-supplement-1_si_001.pdf]

## Supporting Information

### Synthesis and biological activity of human neuropeptide S analogues modified in position 5: identification of potent and pure NPS receptor antagonists

Remo Guerrini<sup>§\*</sup>, Valeria Camarda<sup>#</sup>, Claudio Trapella<sup>§</sup>, Girolamo Calo<sup>#</sup>, Anna Rizzi<sup>#</sup>, Chiara Ruzza<sup>#</sup>, Stella Fiorini<sup>§</sup>, Erika Marzola<sup>§</sup>, Rainer K. Reinscheid<sup>¶</sup>, Domenico Regoli<sup>#</sup>,  
and Severo Salvadori<sup>§</sup>.

#### Table of Contents:

S2: analytical properties of the [ $X^5$ ]NPS analogues

S4-S19 mass spectra of NPS and analogues

S20-S35 analytical HPLC chromatograms of NPS and analogues obtained using system I

S36-S51 analytical HPLC chromatograms of NPS and analogues obtained using system II

**Table 1.** analytical properties of the [X<sup>5</sup>]NPS analogues

| no | Abbreviated names              | <sup>a</sup> t <sub>r</sub> |       | <sup>b</sup> MH <sup>+</sup> |        |
|----|--------------------------------|-----------------------------|-------|------------------------------|--------|
|    |                                | I                           | II    | calculated                   | found  |
|    | hNPS                           | 9.59                        | 13.06 | 2188.5                       | 2188.2 |
| 1  | [Phe <sup>5</sup> ]hNPS        | 10.65                       | 14.14 | 2278.6                       | 2278.6 |
| 2  | [Trp <sup>5</sup> ]hNPS        | 10.96                       | 13.23 | 2317.7                       | 2317.2 |
| 3  | [Leu <sup>5</sup> ]hNPS        | 9.61                        | 13.63 | 2244.6                       | 2244.8 |
| 4  | [Val <sup>5</sup> ]hNPS        | 10.34                       | 14.51 | 2230.6                       | 2231.0 |
| 5  | [Met <sup>5</sup> ]hNPS        | 10.08                       | 13.98 | 2262.7                       | 2262.2 |
| 6  | [Cys <sup>5</sup> ]hNPS        | 10.07                       | 13.92 | 2235.6                       | 2235.2 |
| 7  | [D-Phe <sup>5</sup> ]hNPS      | 10.46                       | 14.22 | 2278.6                       | 2278.6 |
| 8  | [D-Trp <sup>5</sup> ]hNPS      | 10.76                       | 14.30 | 2317.7                       | 2318.0 |
| 9  | [D-Leu <sup>5</sup> ]hNPS      | 9.54                        | 13.69 | 2244.6                       | 2244.6 |
| 10 | [D-Val <sup>5</sup> ]hNPS      | 9.92                        | 13.92 | 2230.6                       | 2230.8 |
| 11 | [D-Met <sup>5</sup> ]hNPS      | 9.75                        | 14.01 | 2262.7                       | 2263.6 |
| 12 | [D-Cys <sup>5</sup> ]hNPS      | 9.98                        | 13.82 | 2235.6                       | 2235.4 |
| 13 | [D-Cys(Acm) <sup>5</sup> ]hNPS | 10.68                       | 14.08 | 2307.7                       | 2307.8 |
| 14 | [D-Cys(Bzl) <sup>5</sup> ]hNPS | 10.92                       | 14.52 | 2324.7                       | 2324.2 |
| 15 | [D-Cys(tBu) <sup>5</sup> ]hNPS | 10.86                       | 14.34 | 2291.7                       | 2290.4 |

<sup>a</sup>t<sub>r</sub> is the retention time determined by analytical HPLC. Retention time I was obtained using a Nucleodur C<sub>18</sub> column (4.6 x 100 mm, 2 μm particle size) with the solvent system A (10%, v/v, acetonitrile in 0.1% TFA) and solvent system B (60%, v/v, acetonitrile in 0.1% TFA). The column was perfused at a flow rate of 0.6 mL / min using a linear gradient from 0% to 70% B over 25 min.

Retention time II was obtained using a Hypersil BDS C<sub>18</sub> column (4.6 x 150 mm, 5 μm particle size) with solvent system A (35 mM NaH<sub>2</sub>PO<sub>4</sub> (pH 2.1)) and solvent system B (59 mM NaH<sub>2</sub>PO<sub>4</sub> (pH 2.1)-acetonitrile (60:40 v/v)). The column was perfused at a flow rate of 1 mL/min with a linear gradient from 5% to 70% B over 25 min

<sup>b</sup>The mass ion (MH<sup>+</sup>) was obtained by electro spray mass spectrometry.

# Mass spectra of hNPS analogues

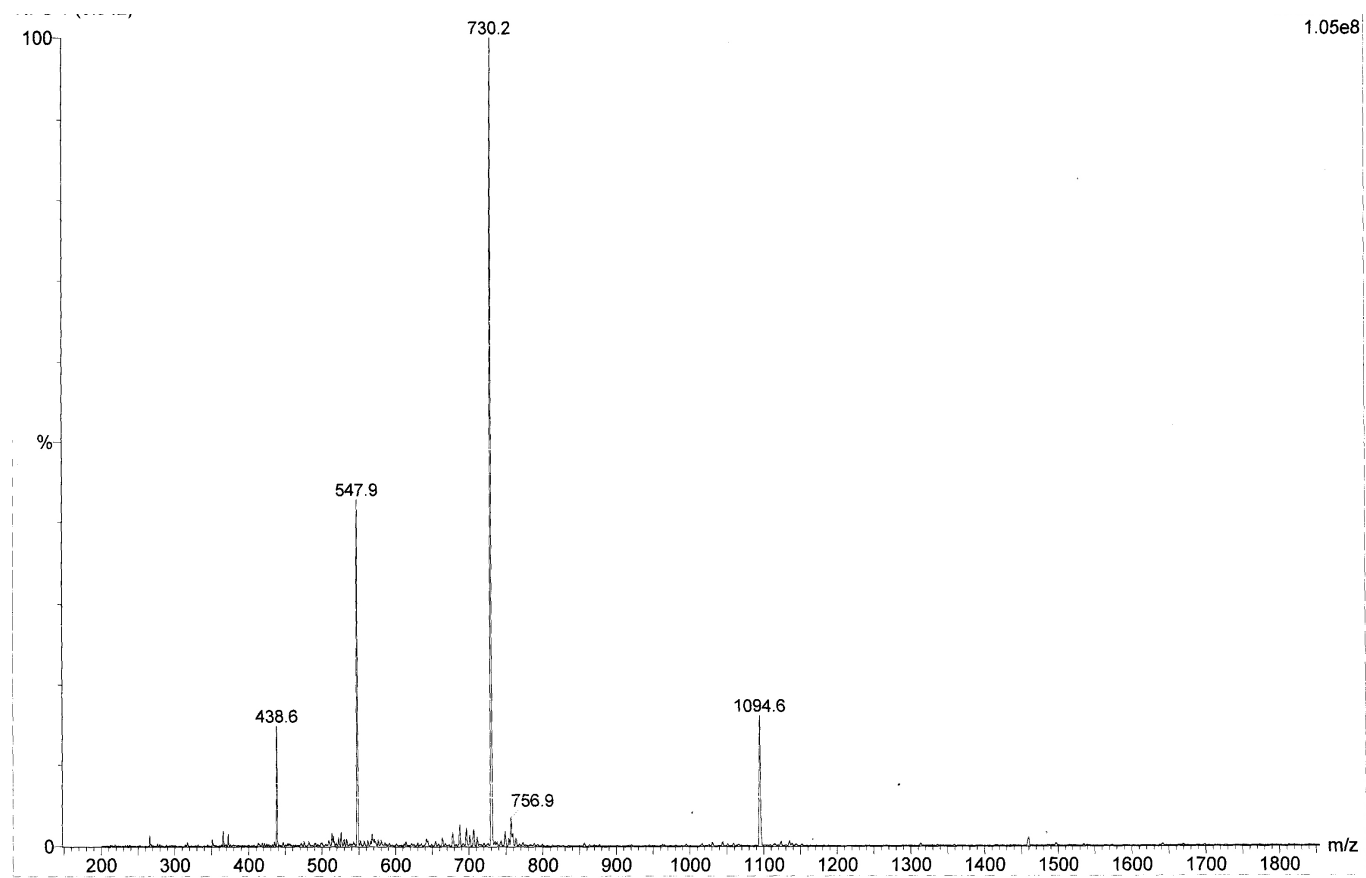

hNPS

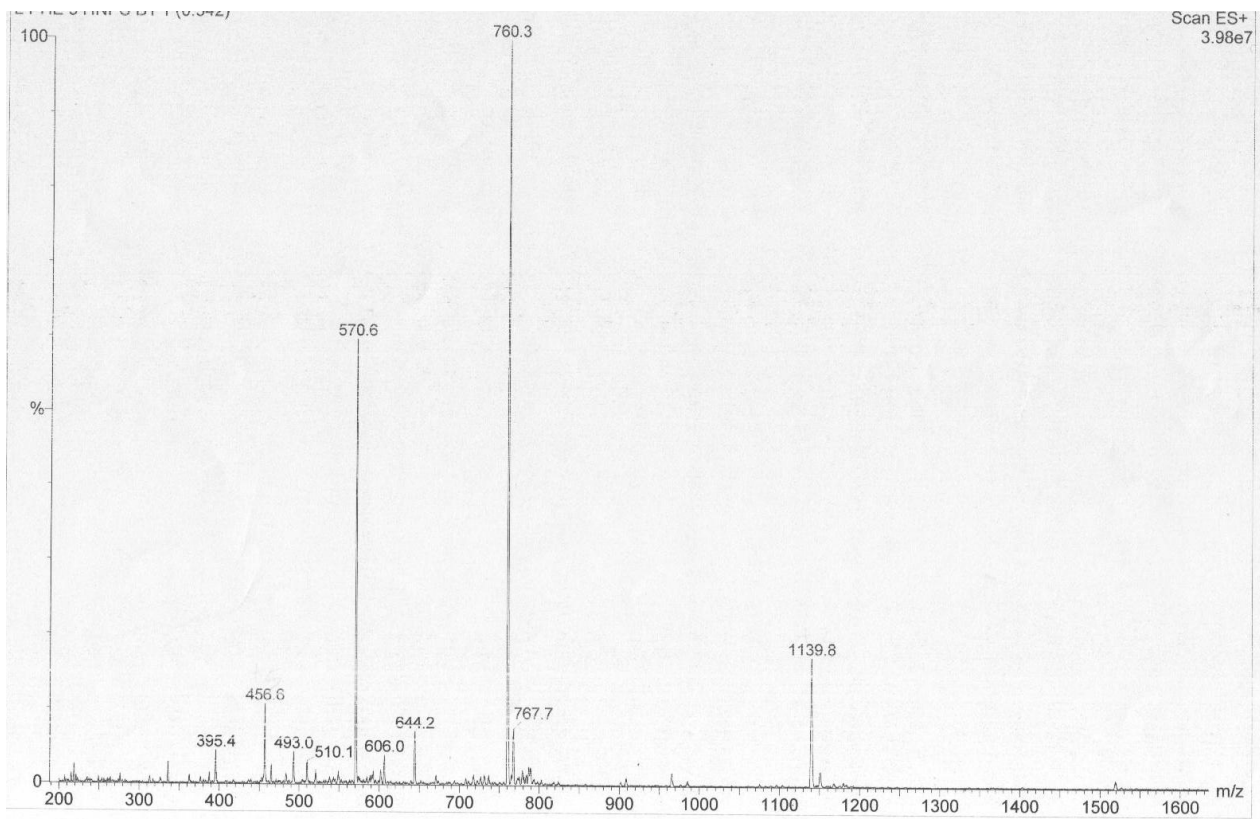

Compound 1

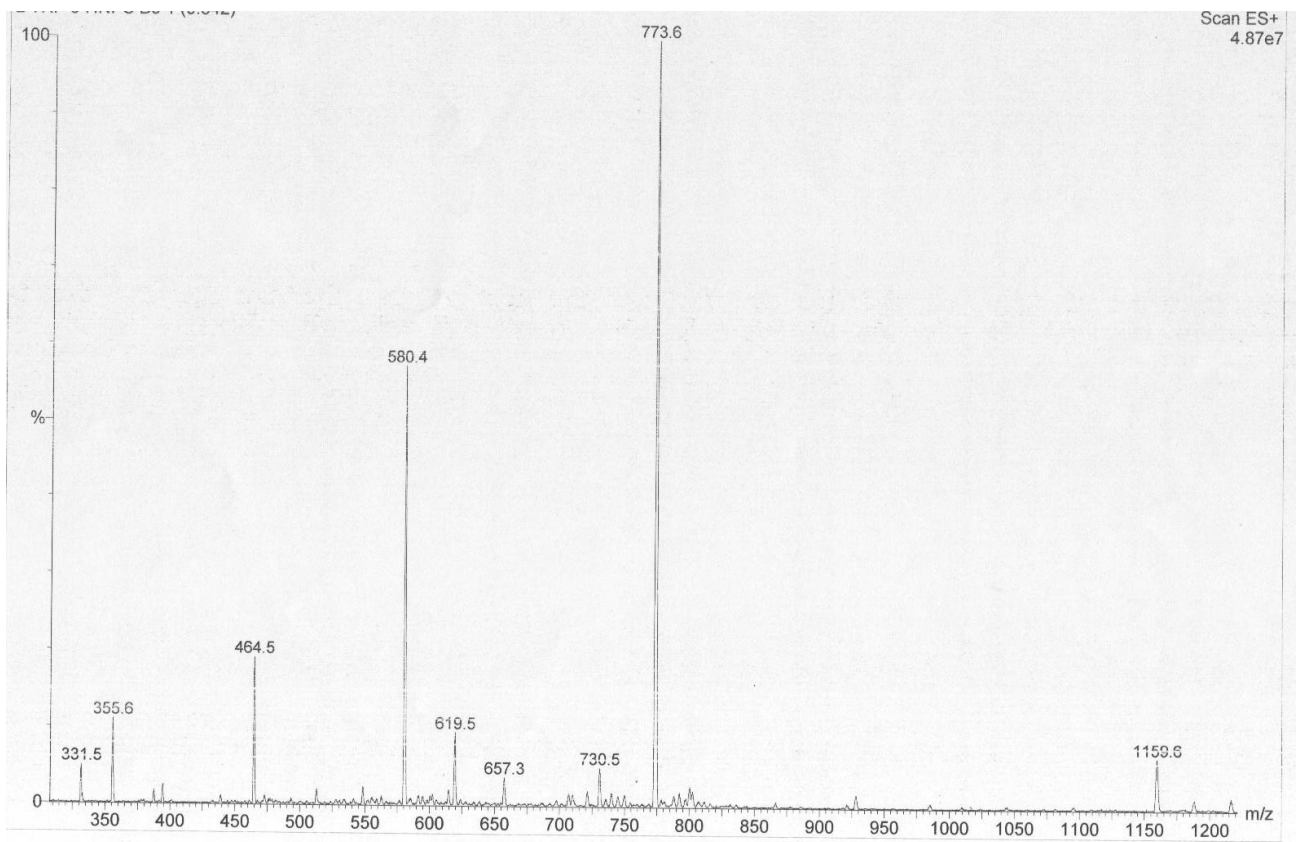

Compound 2

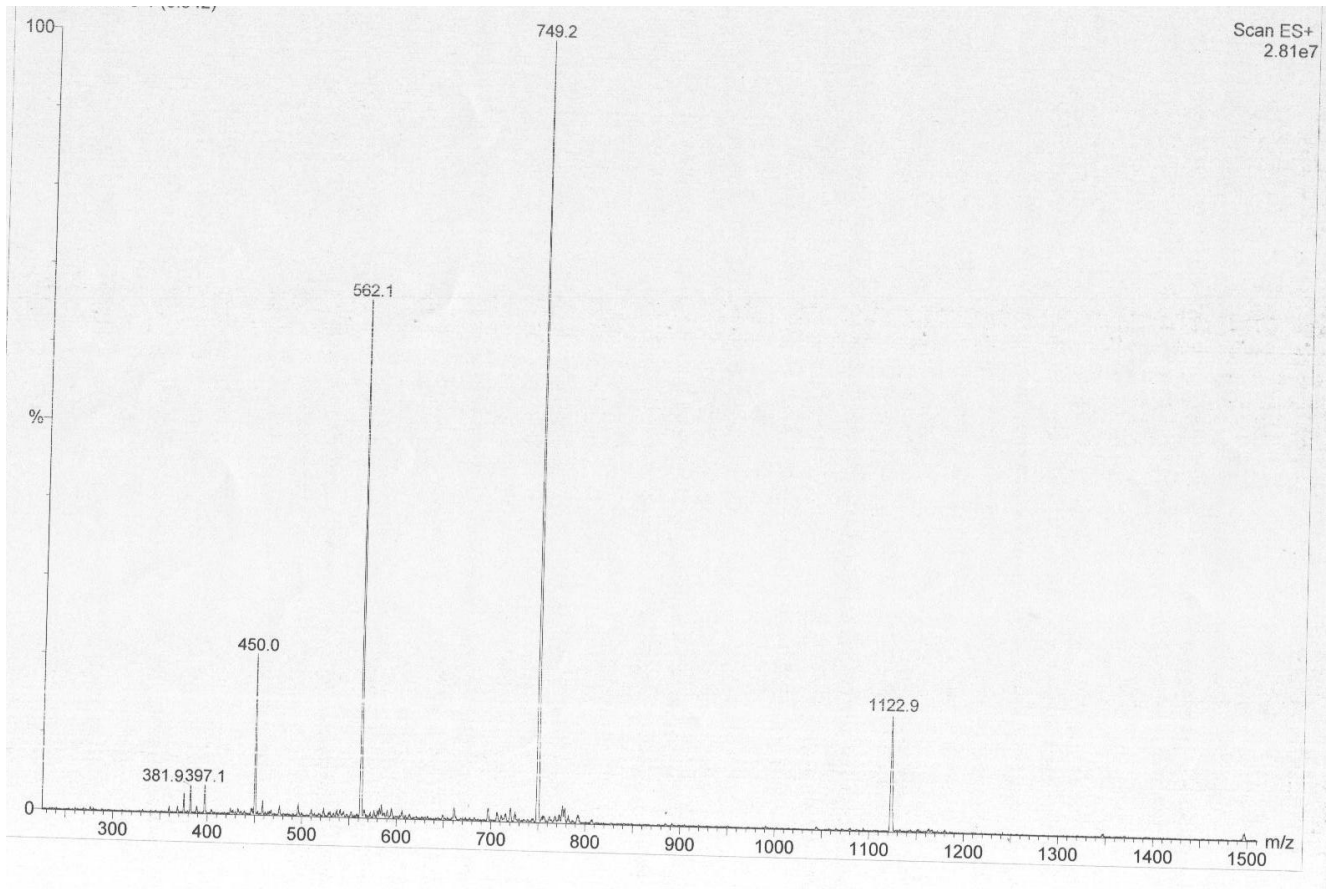

Compound 3

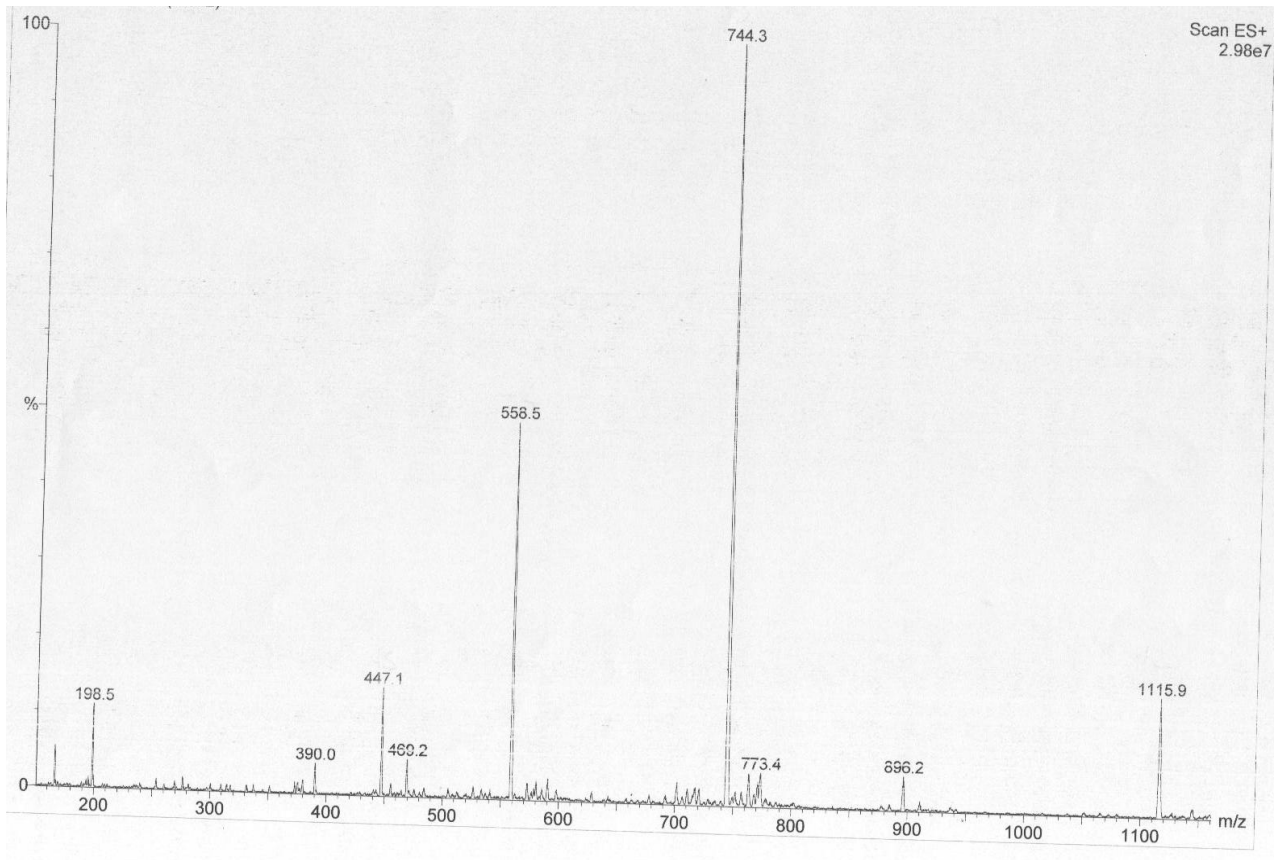

Compound 4



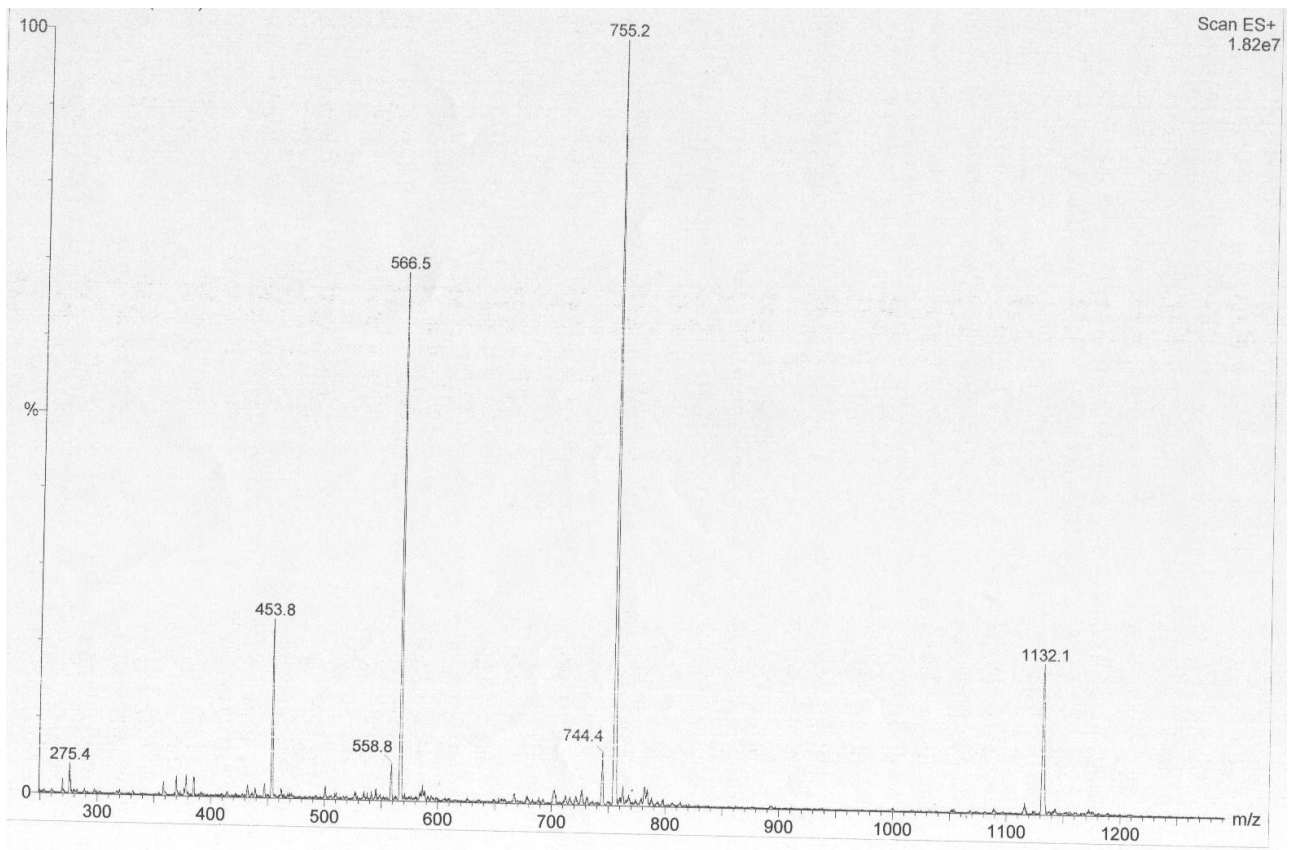

Compound 5

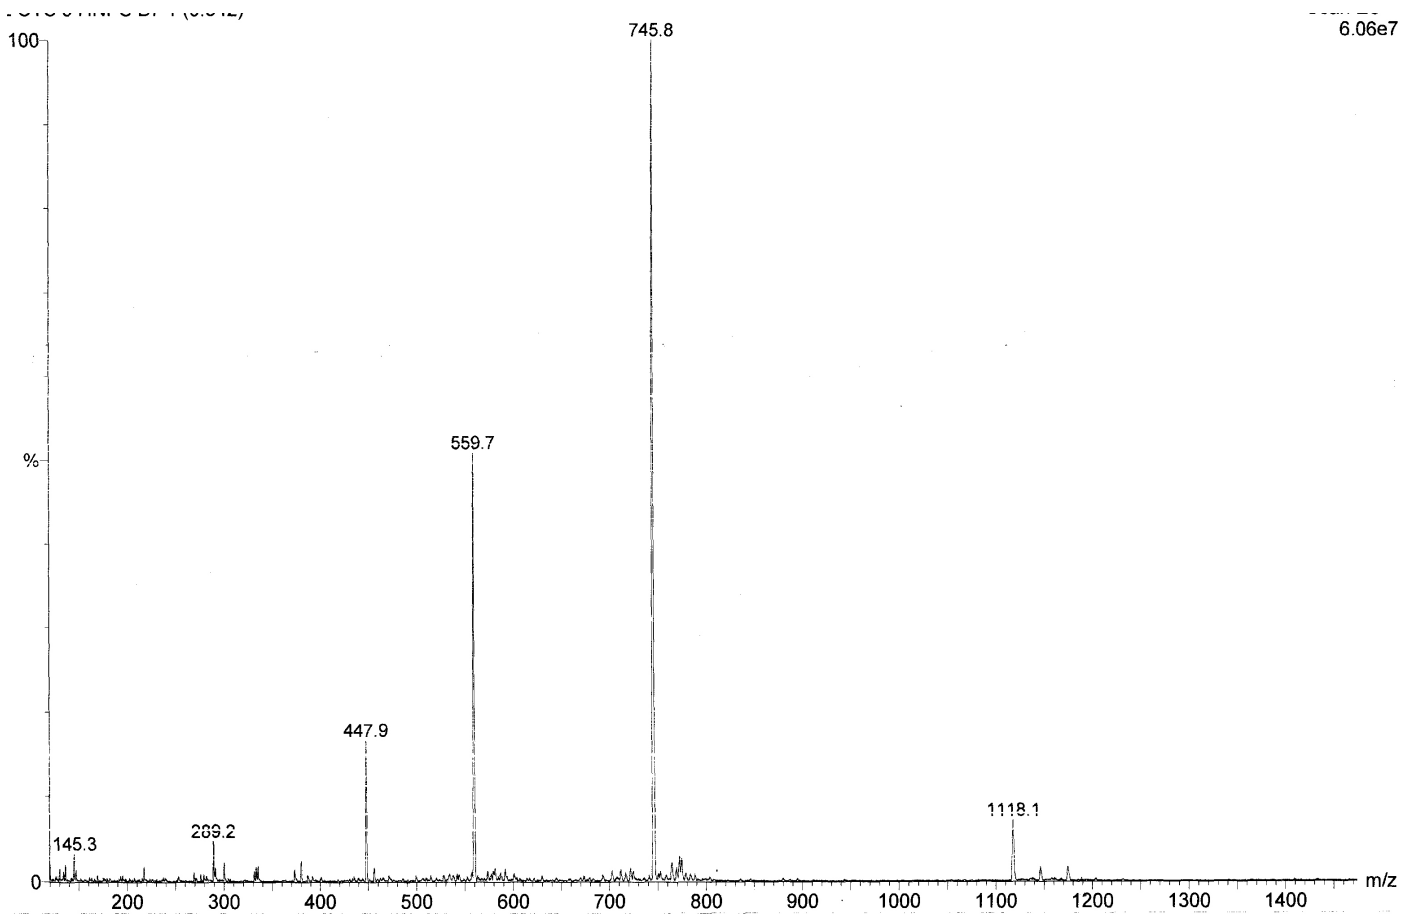

Compound 6

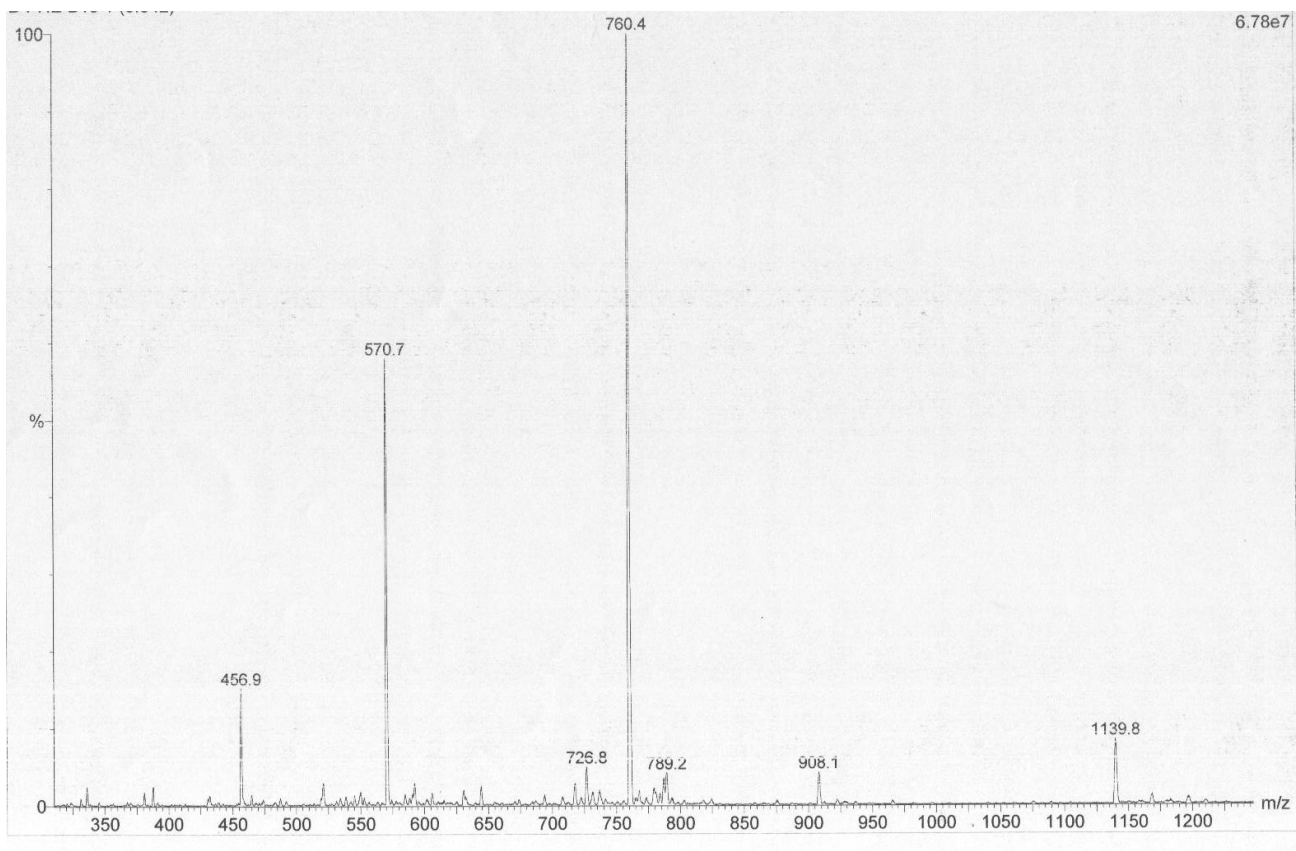

Compound 7

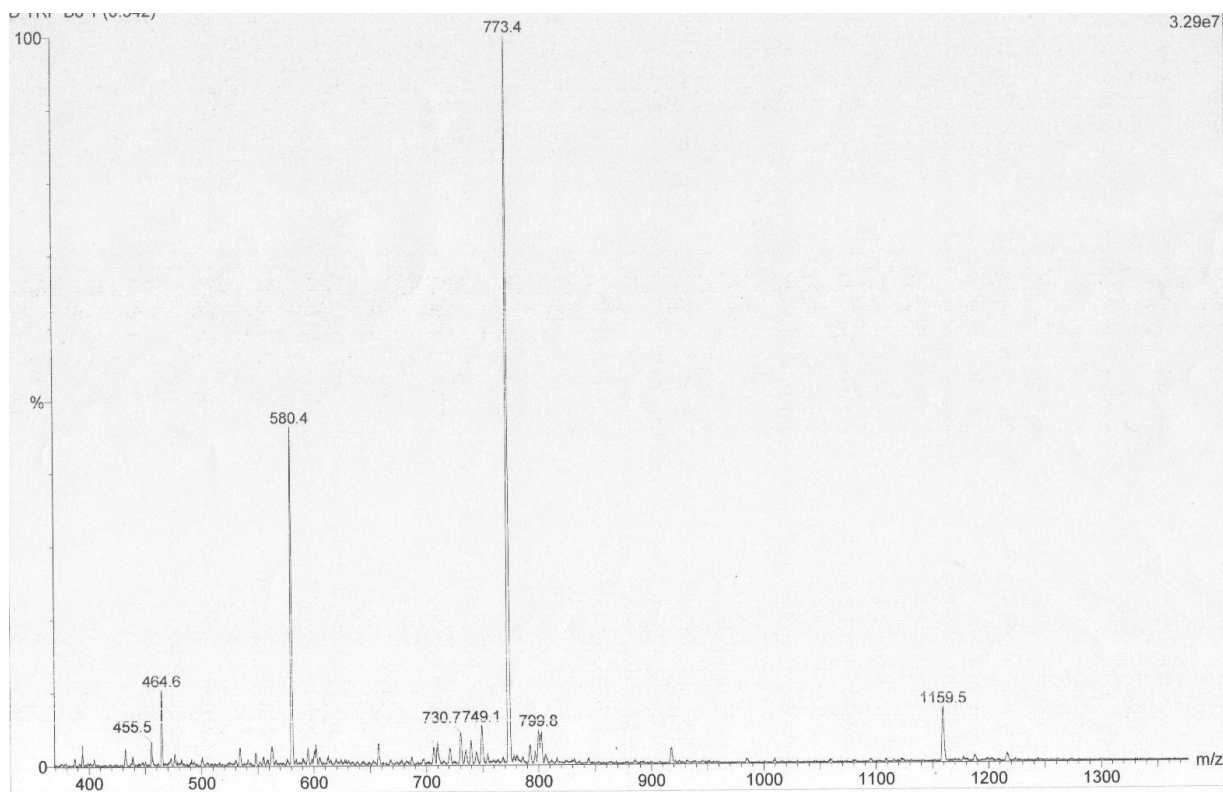

Compound 8

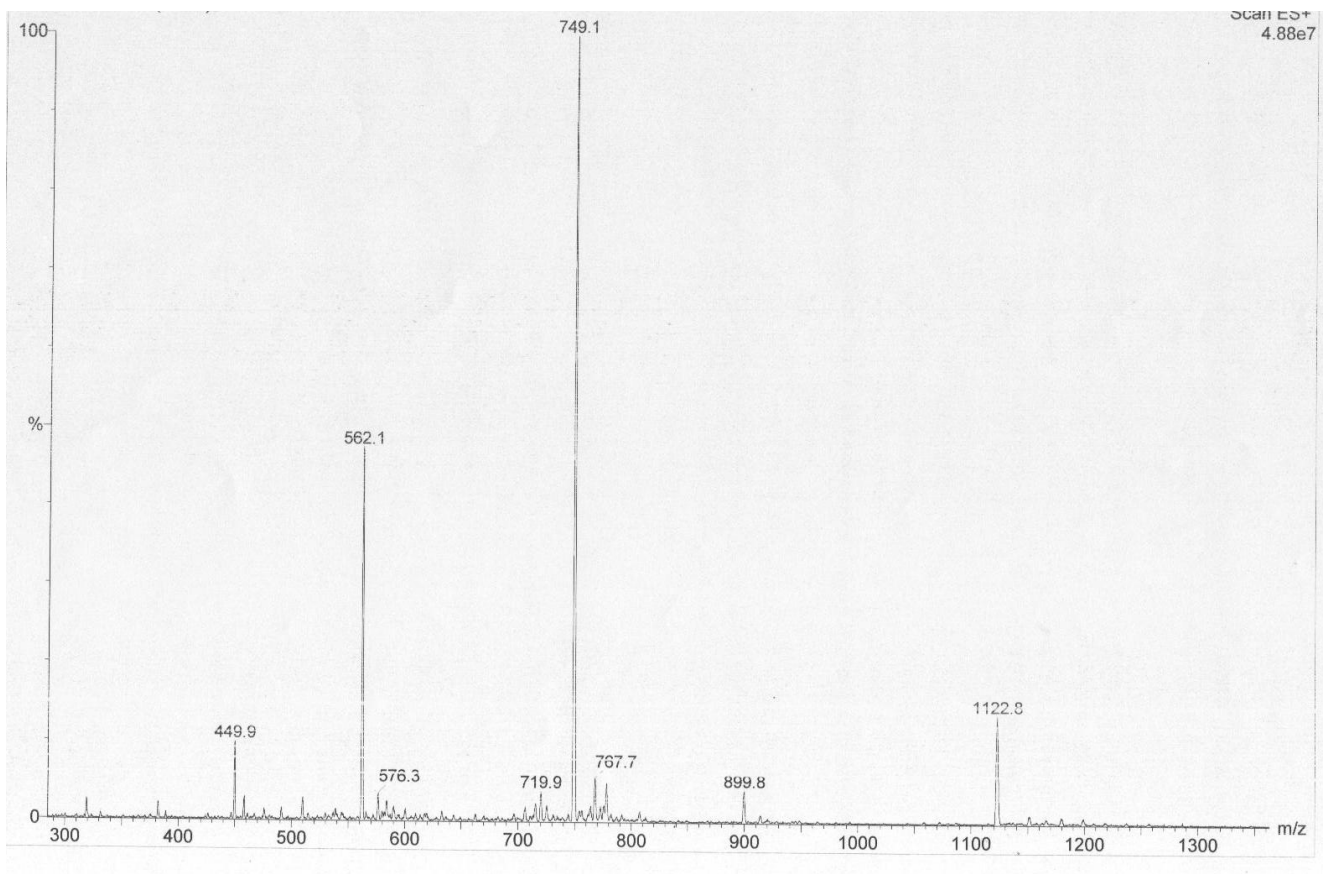

Compound 9

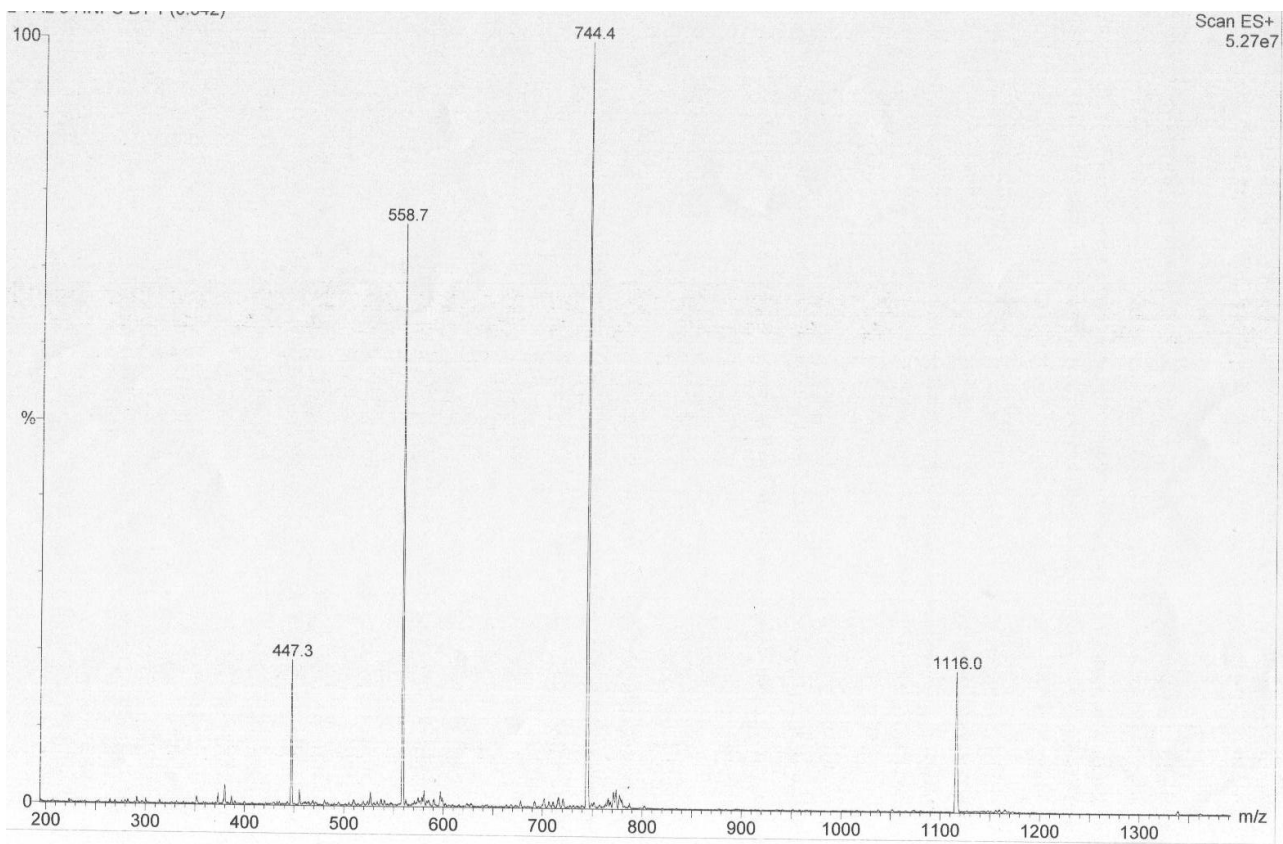

Compound 10

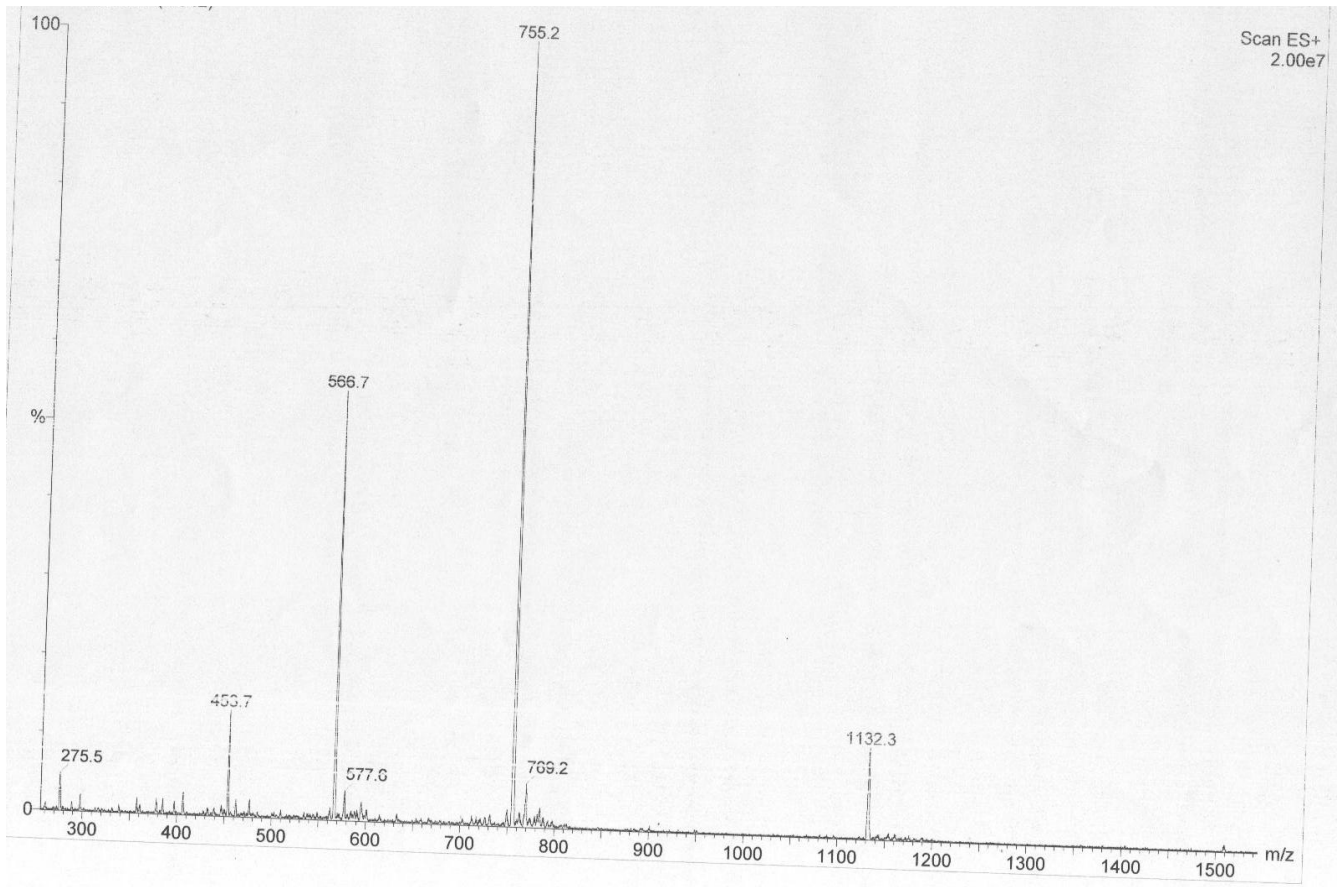

Compound 11

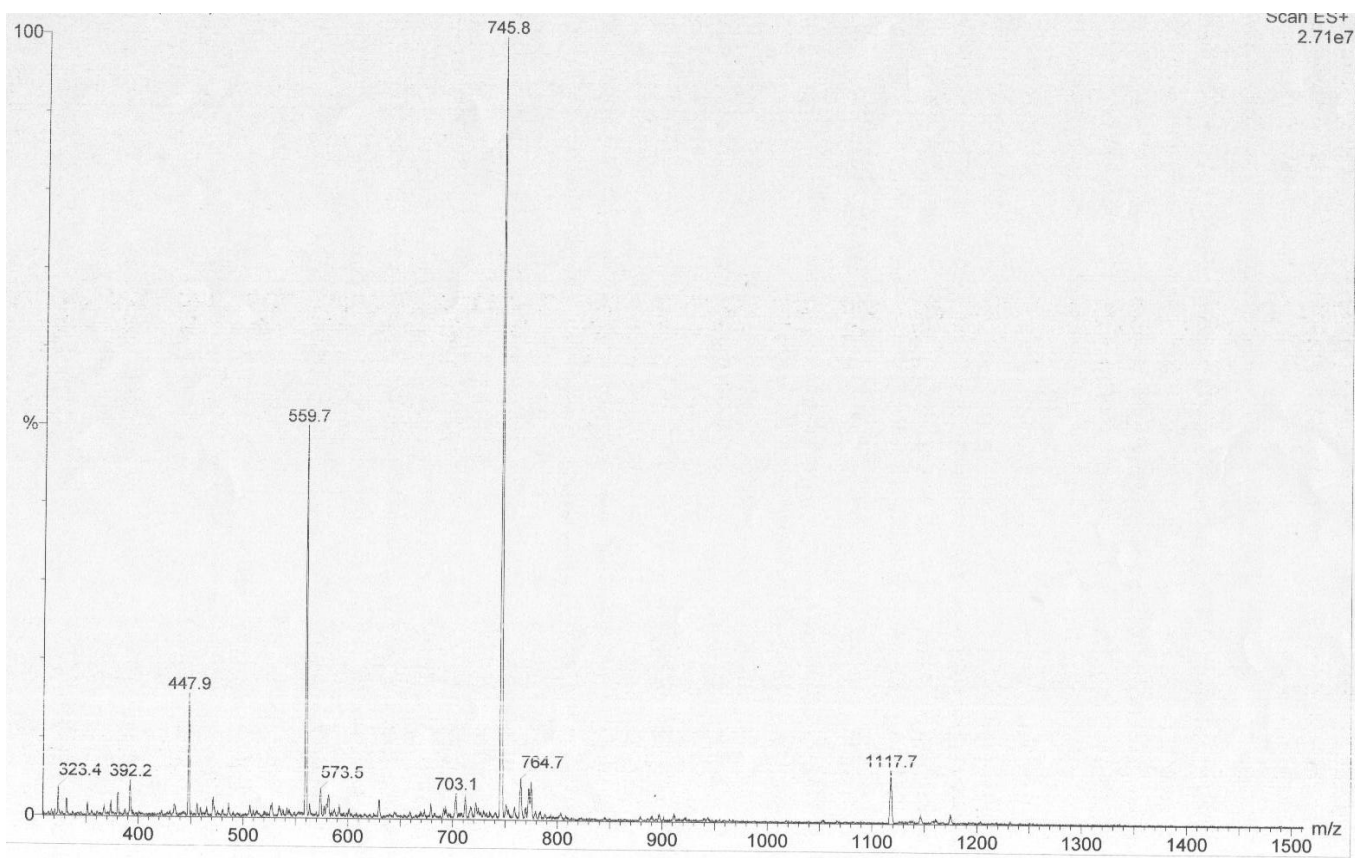

Compound 12



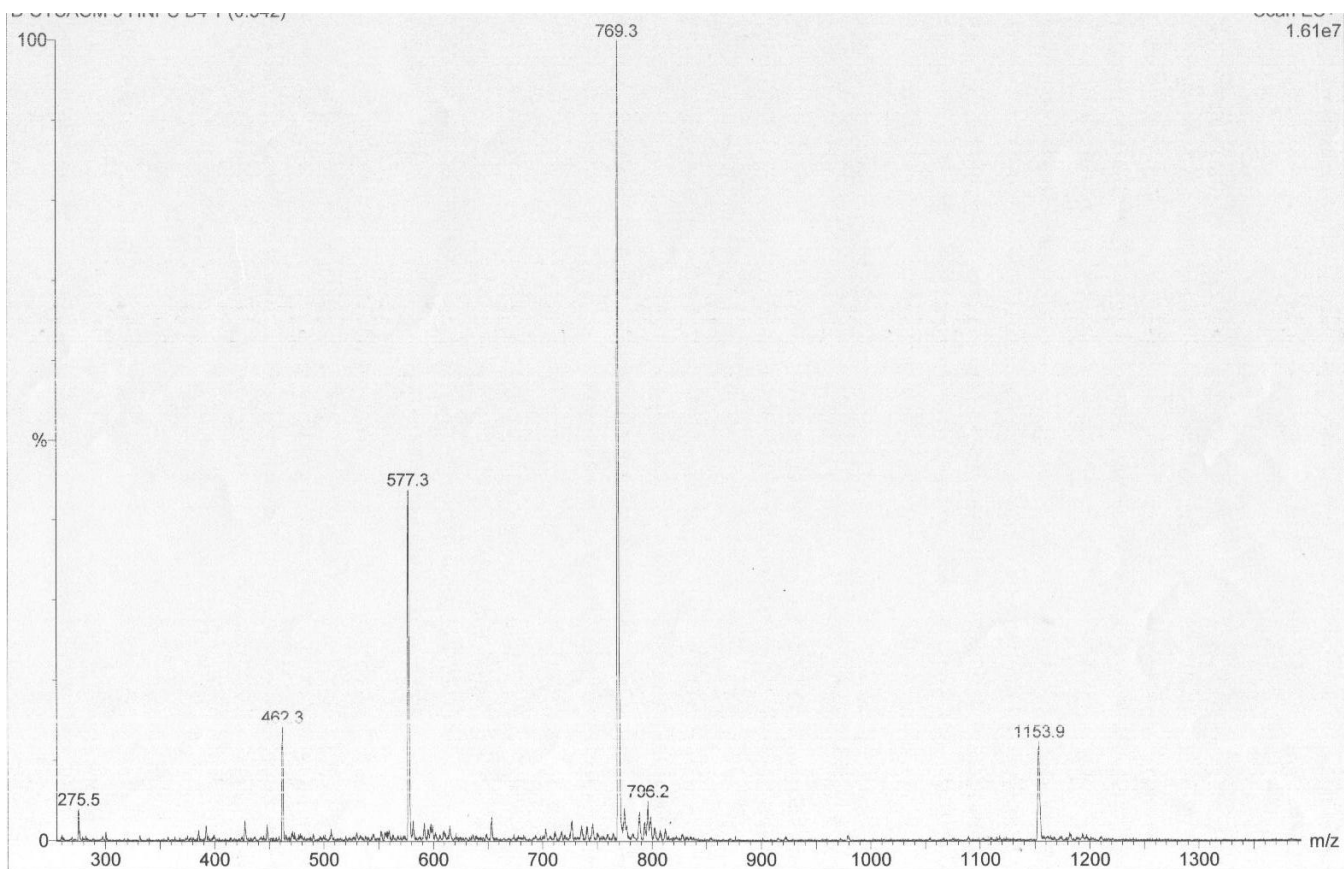

Compound 13

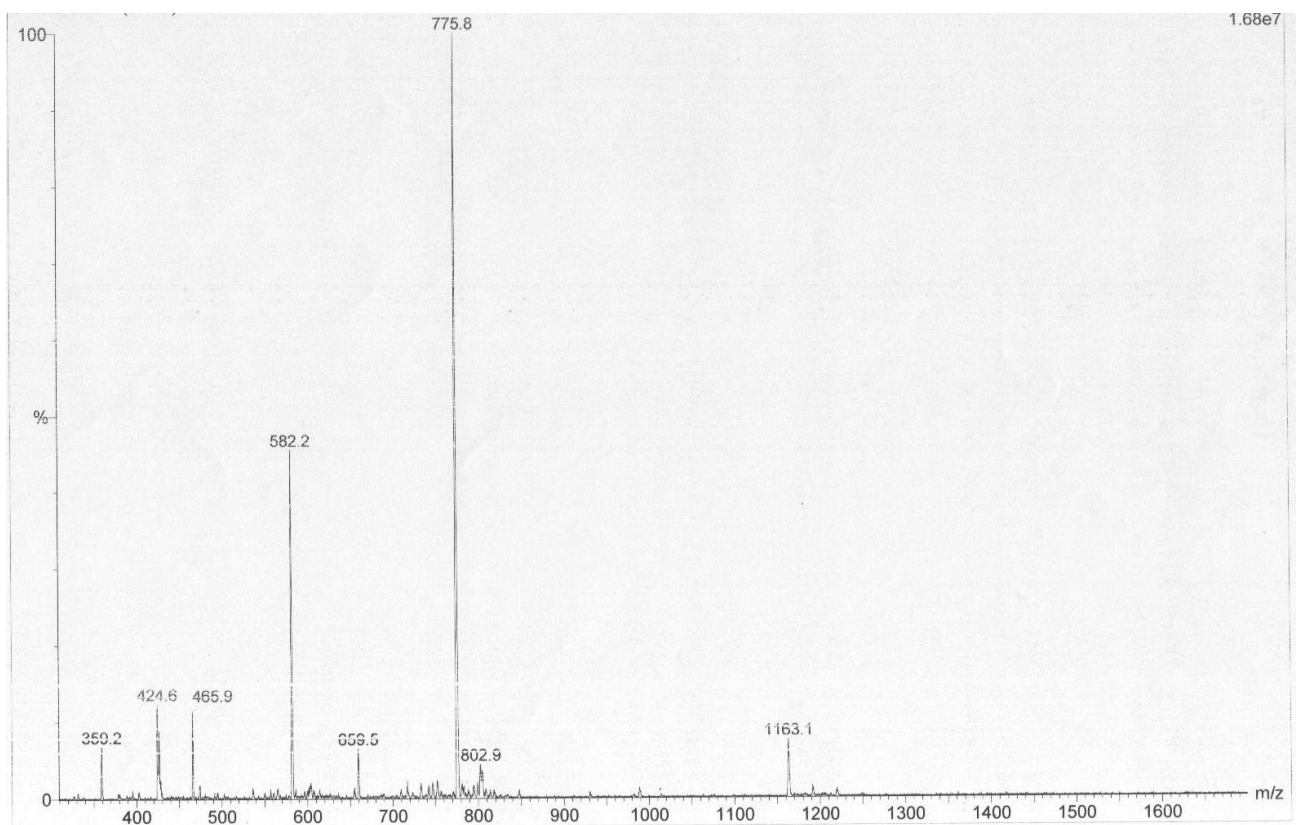

Compound 14

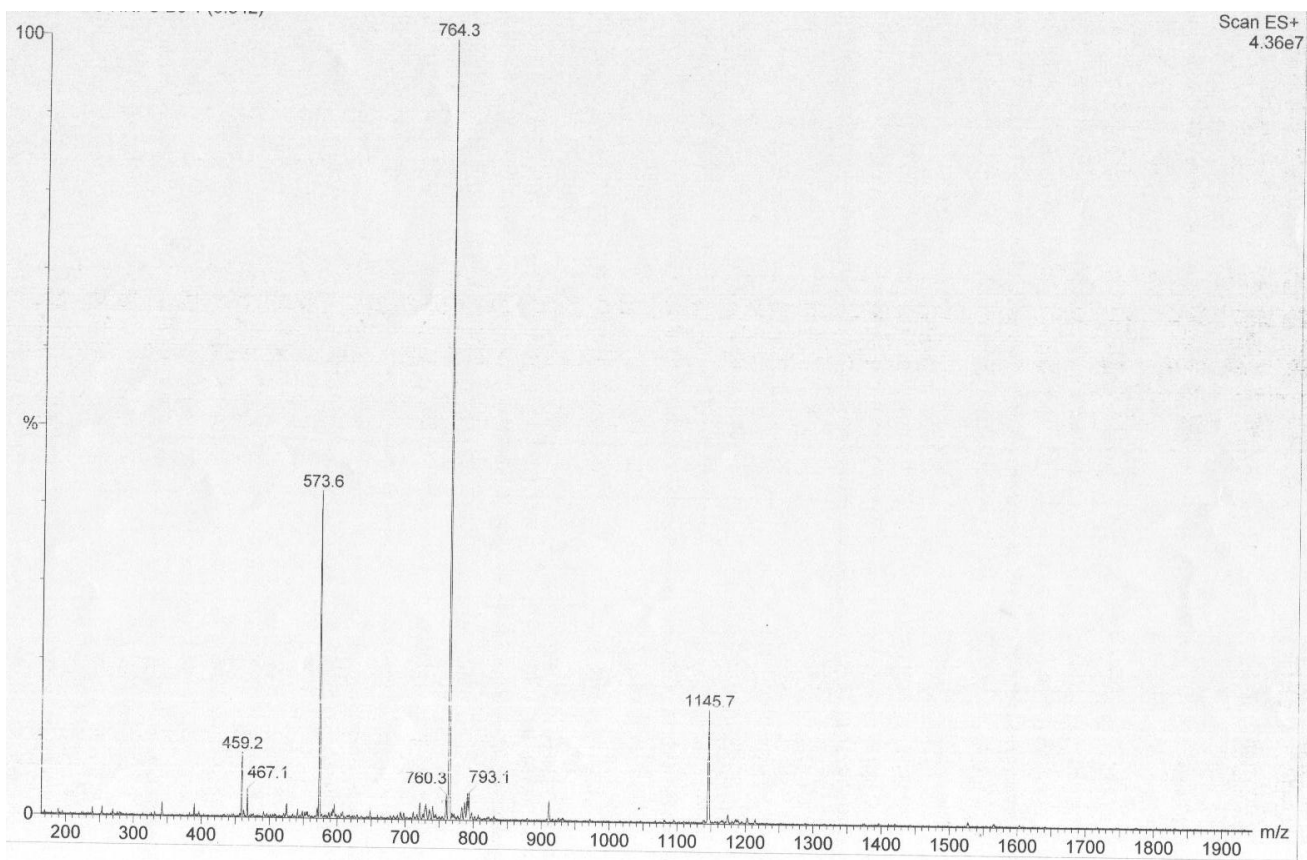

Compound 15

HPLC chromatograms of hNPS analogues (system I)

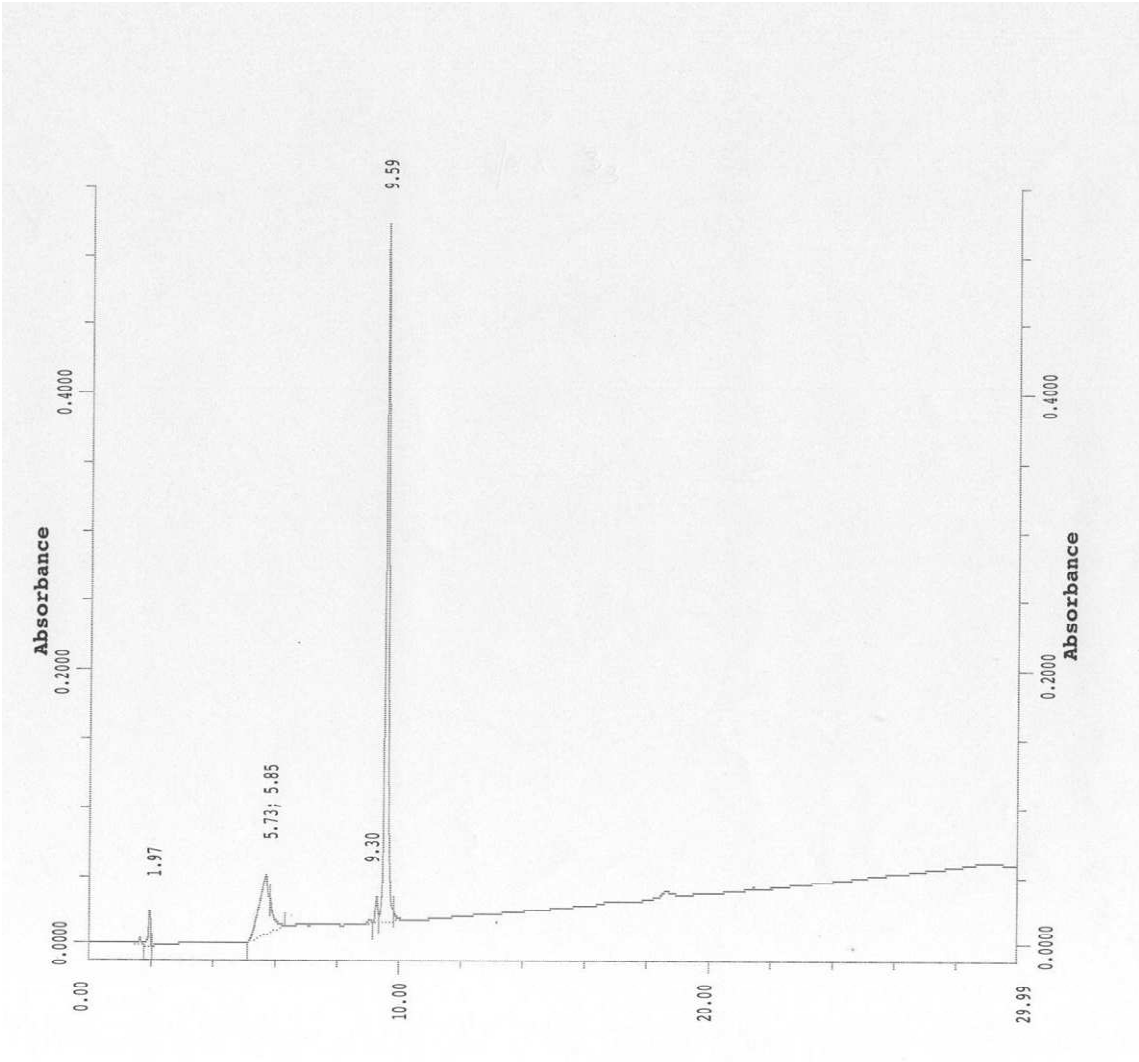

hNPS

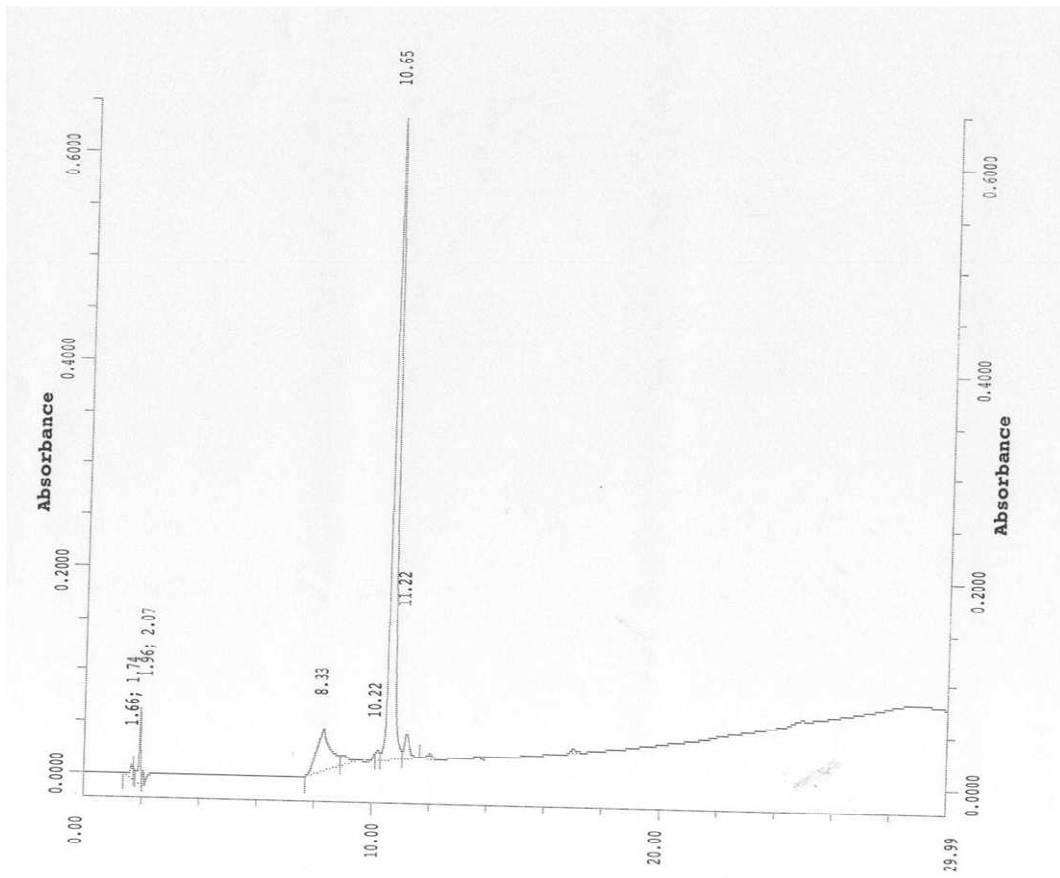

Compound 1

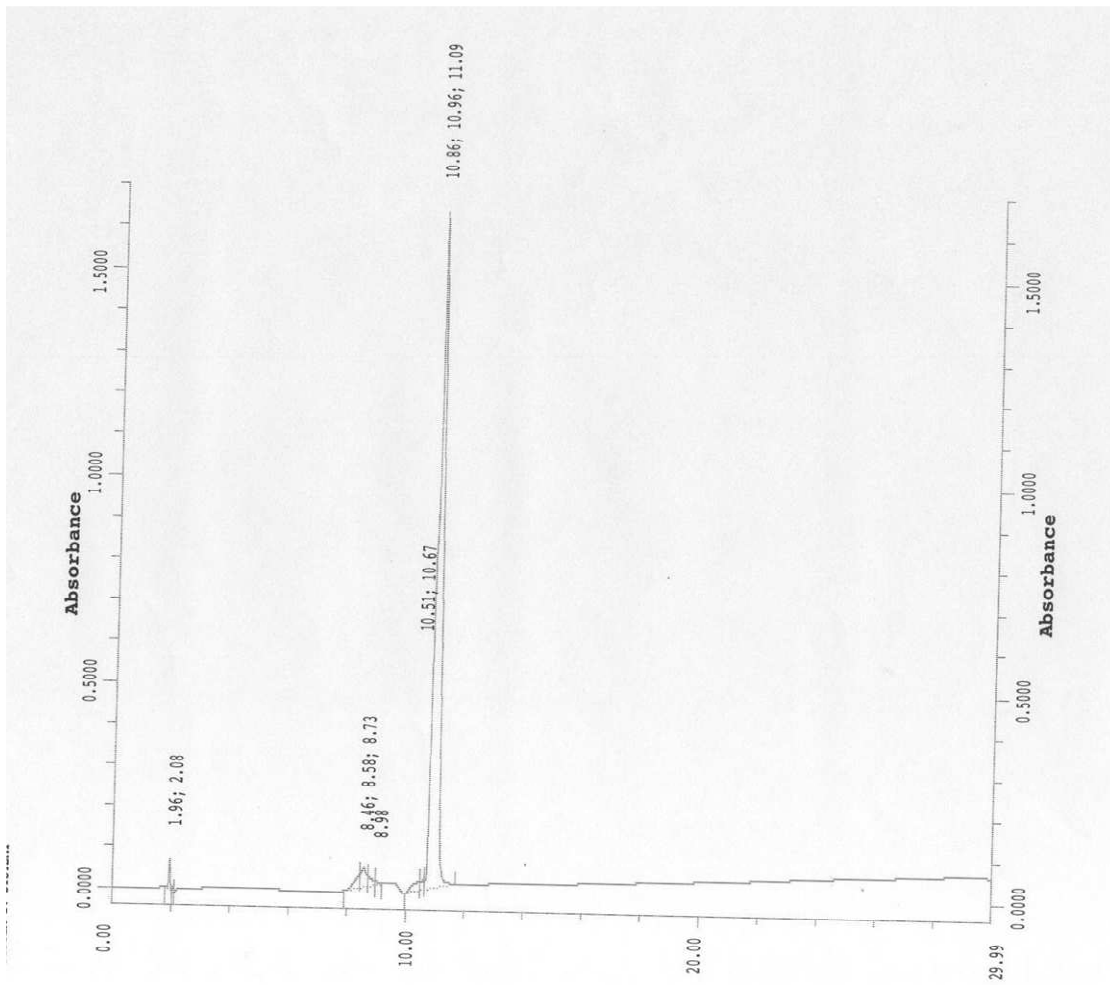

Compound 2

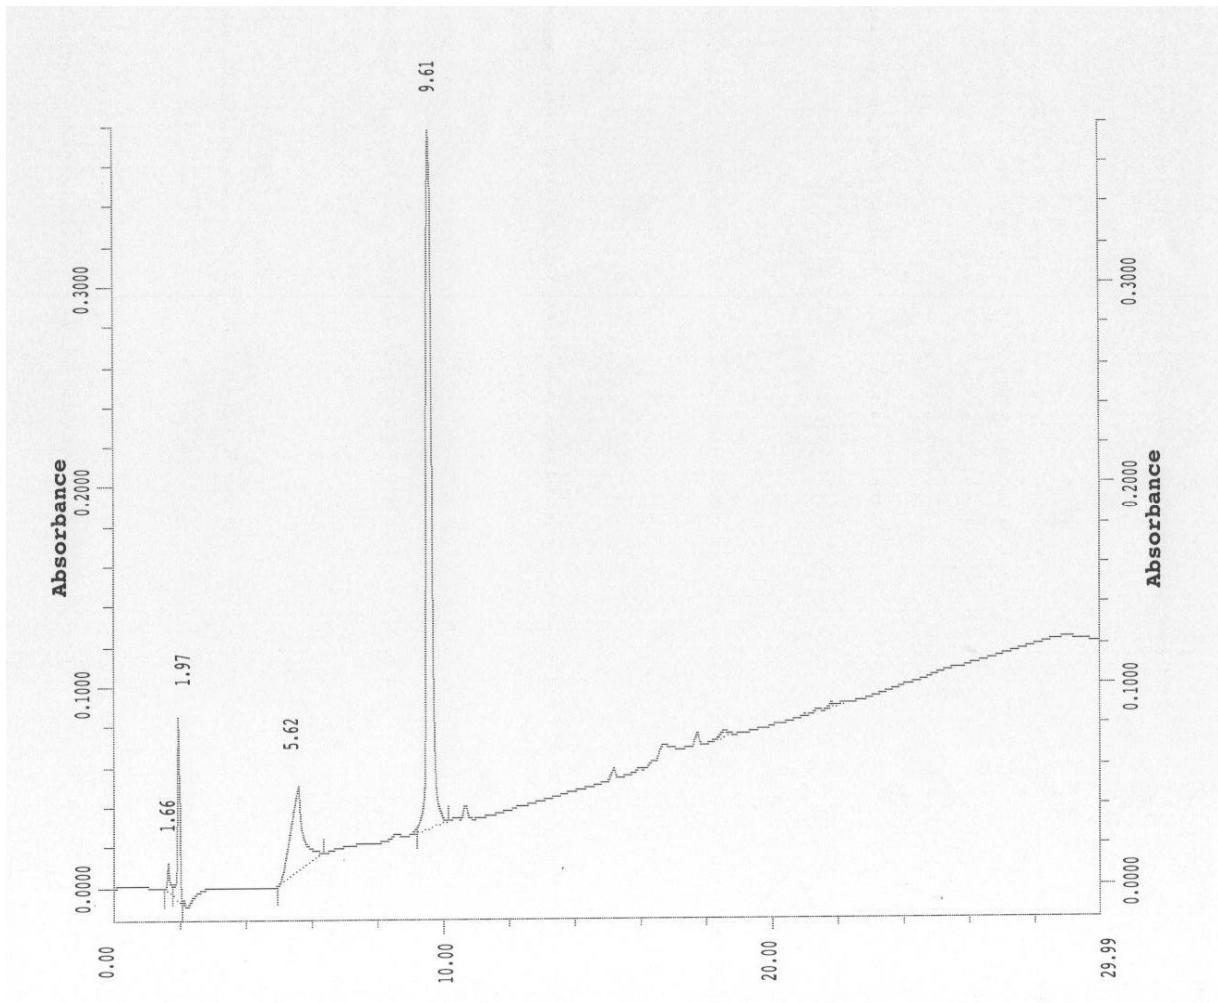

Compound 3

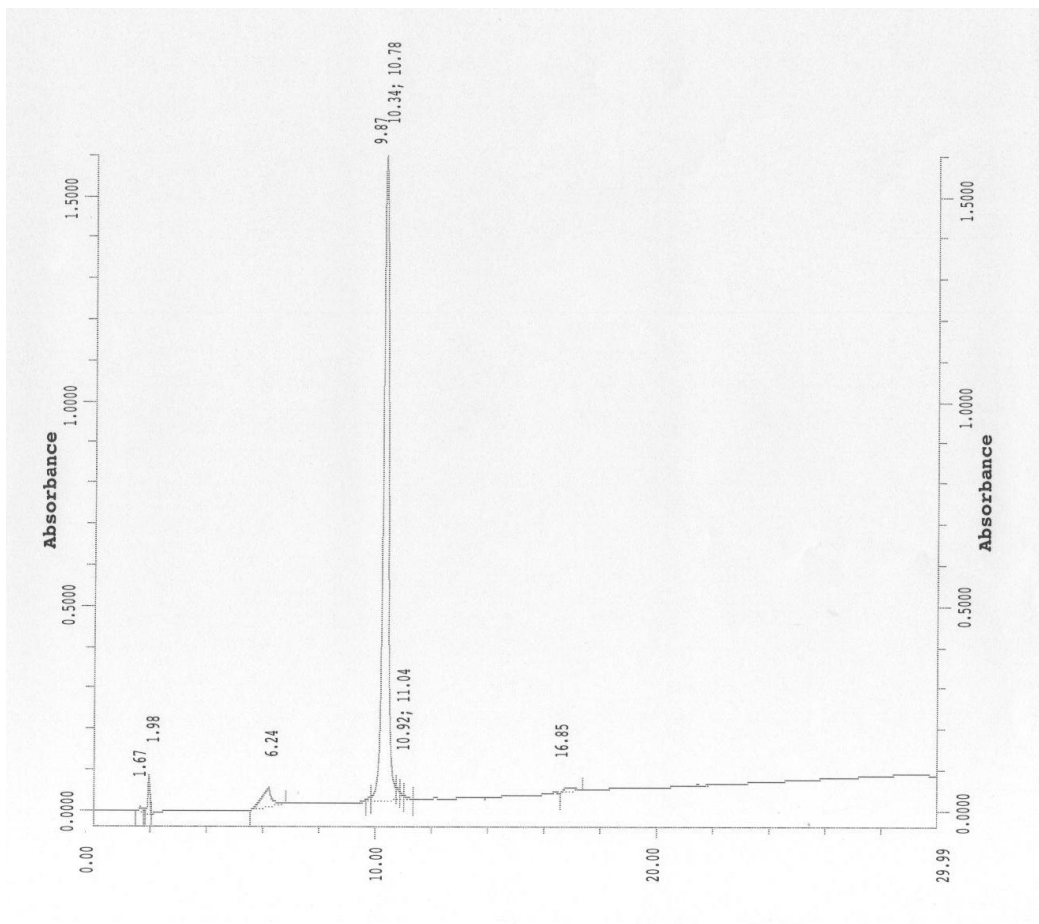

Compound 4



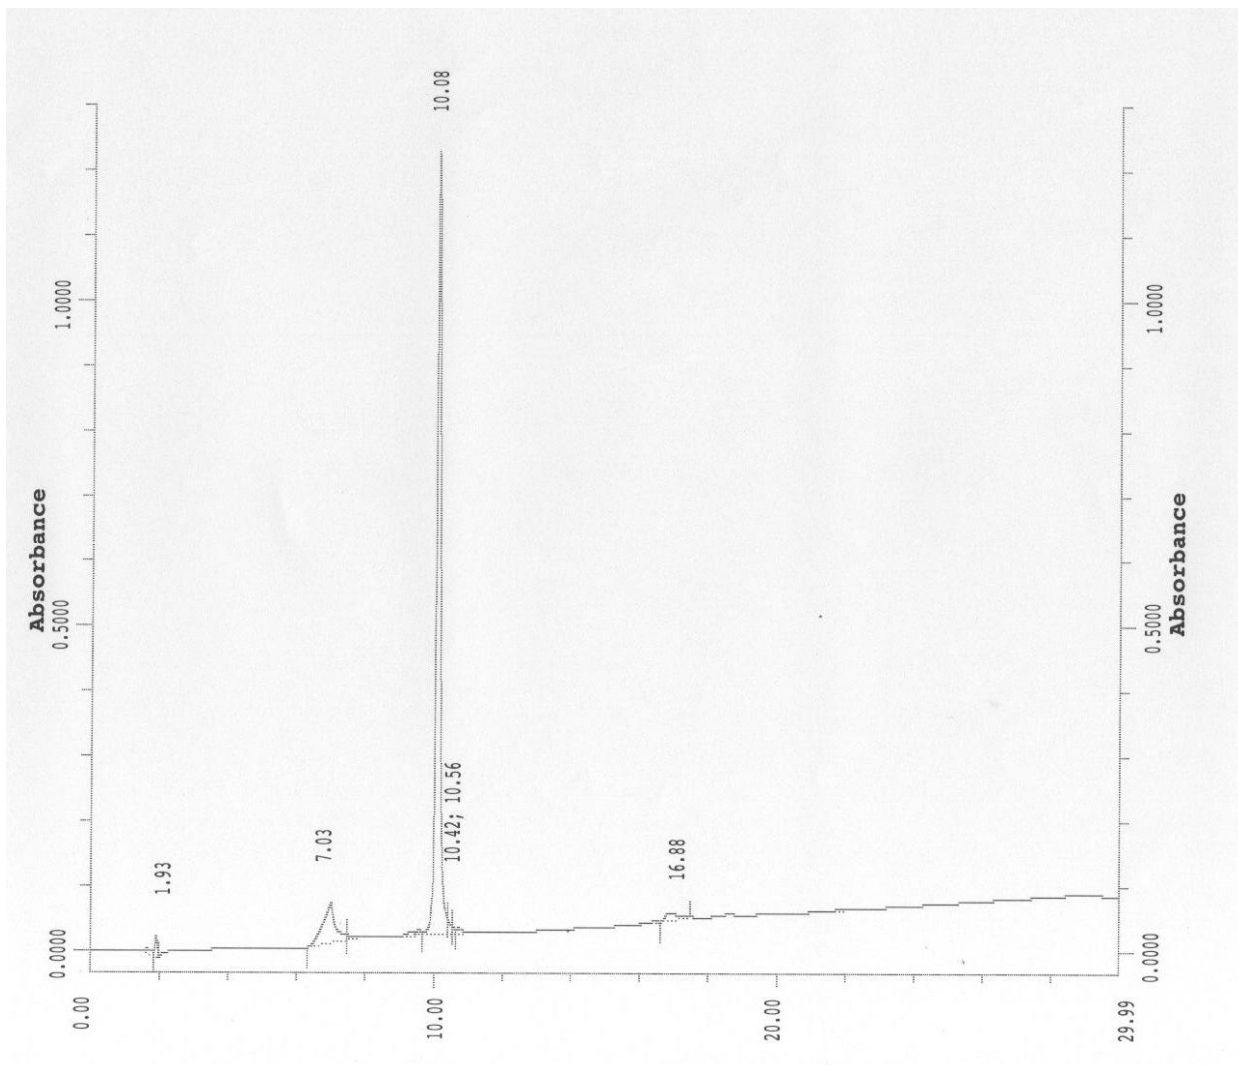

Compound 5

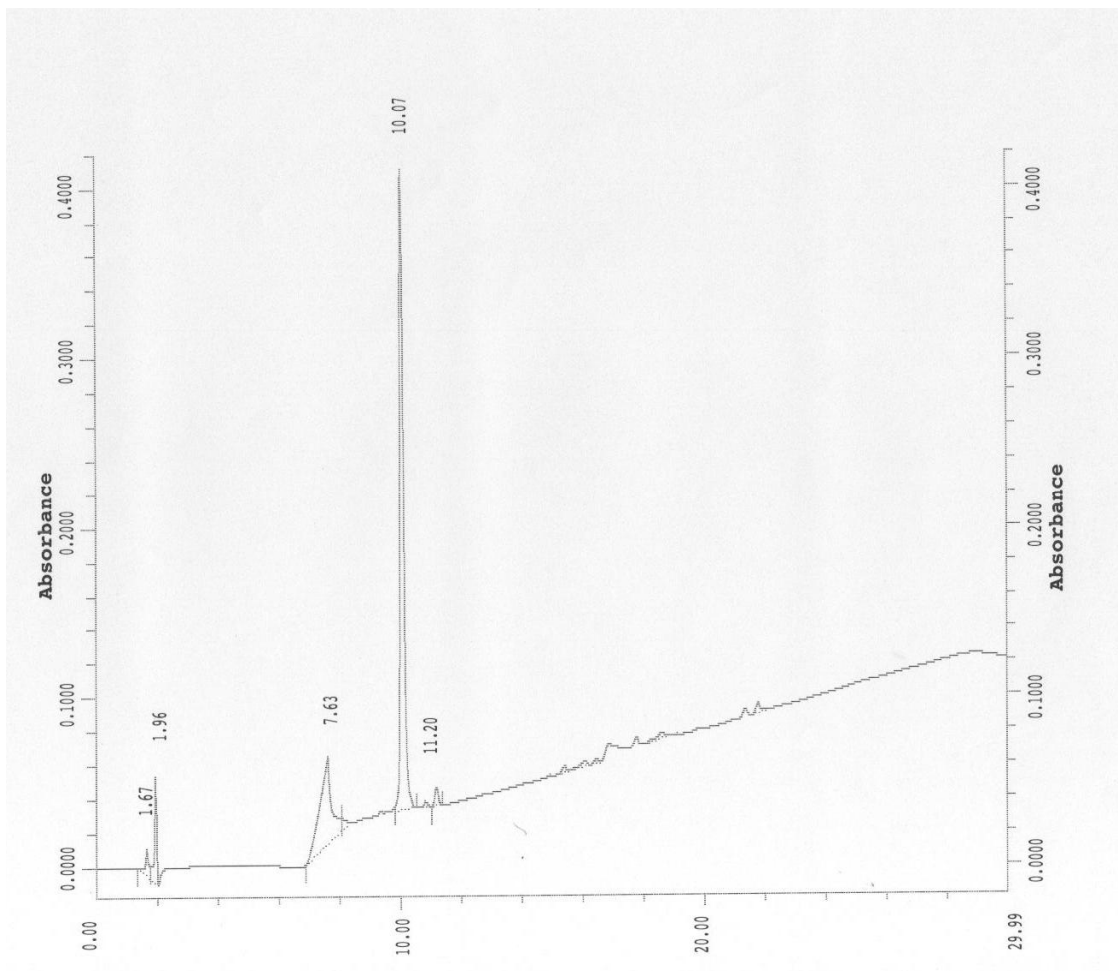

Compound 6

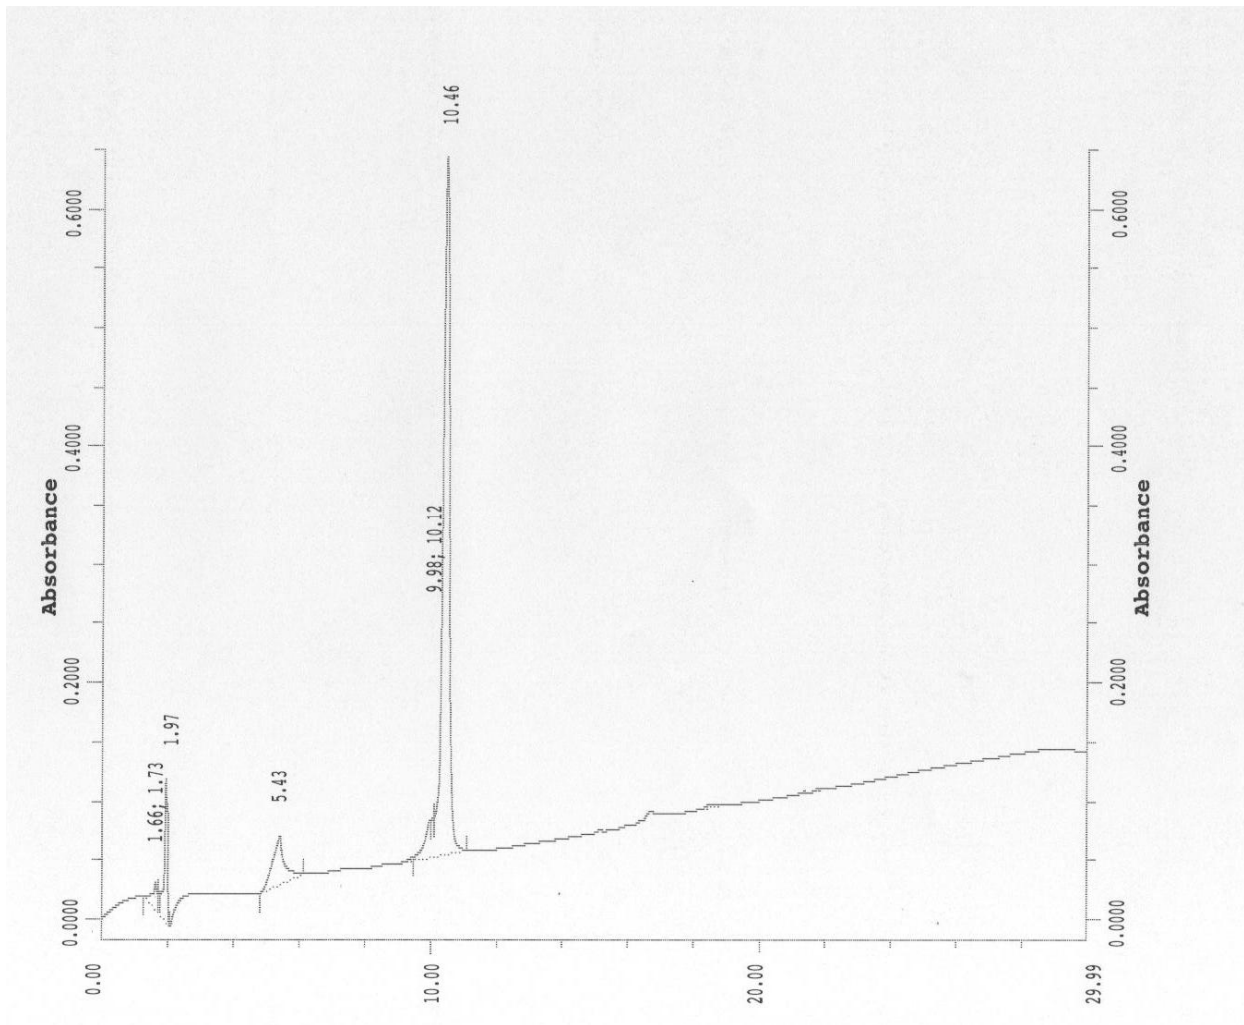

Compound 7

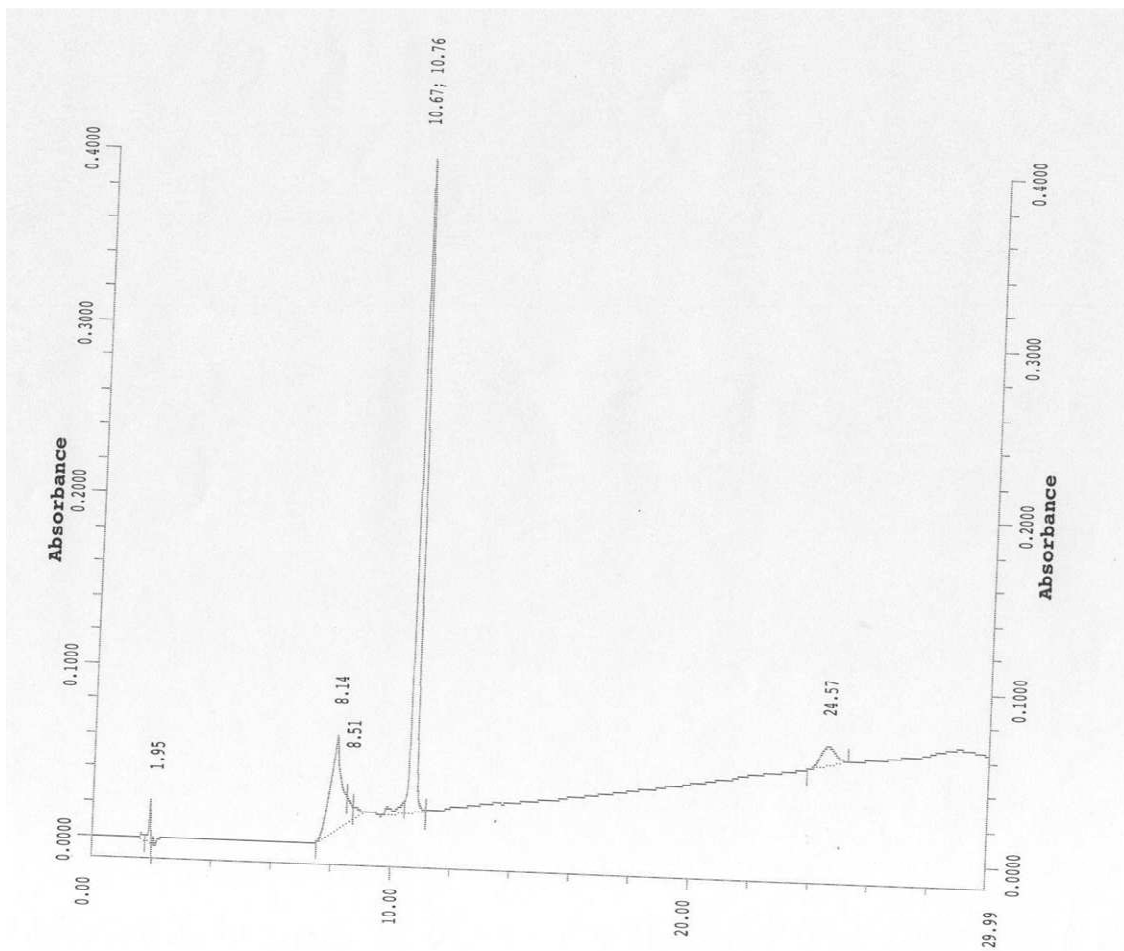

Compound 8

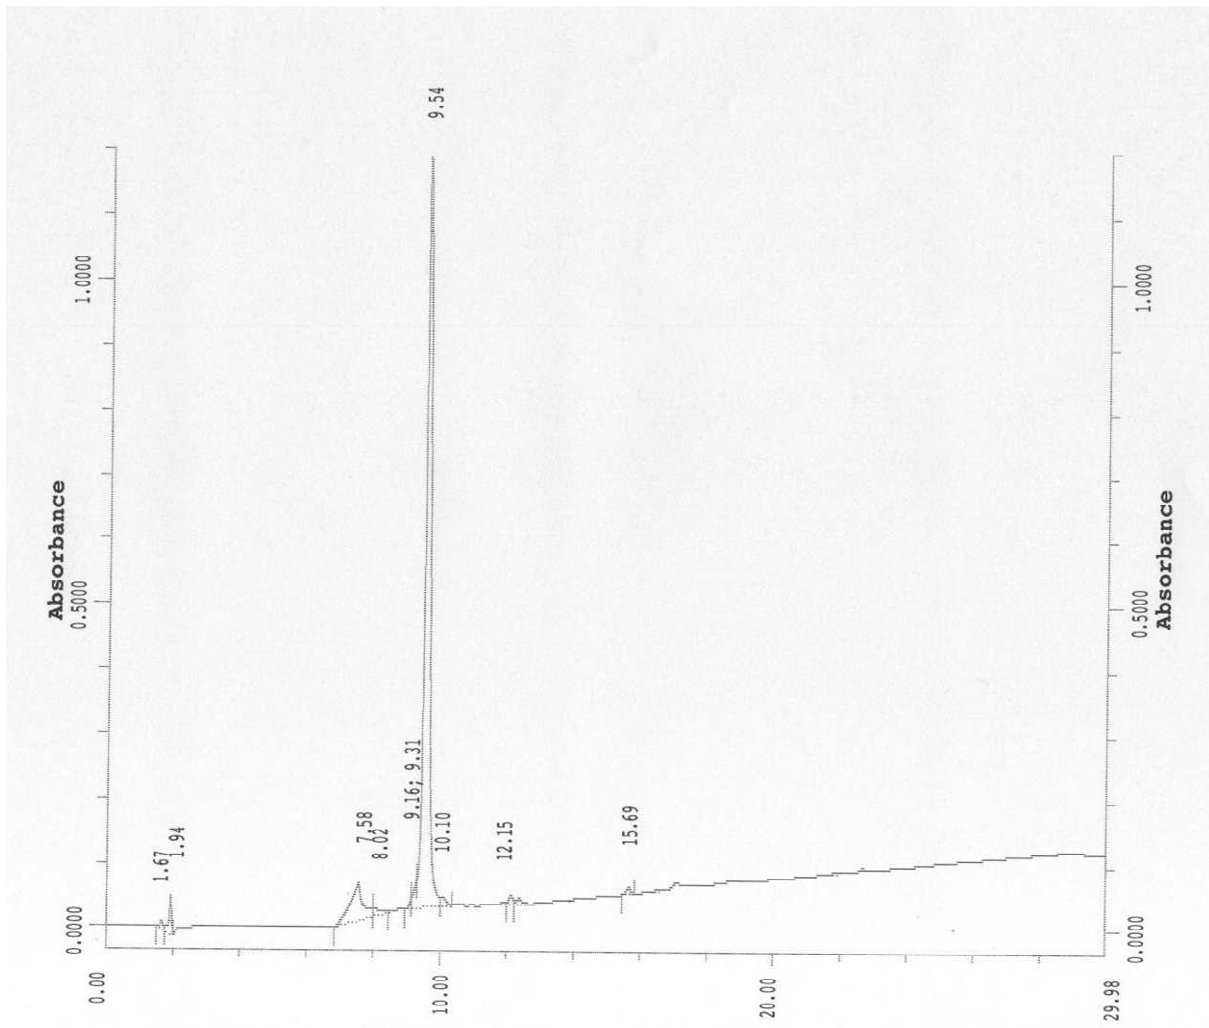

Compound 9

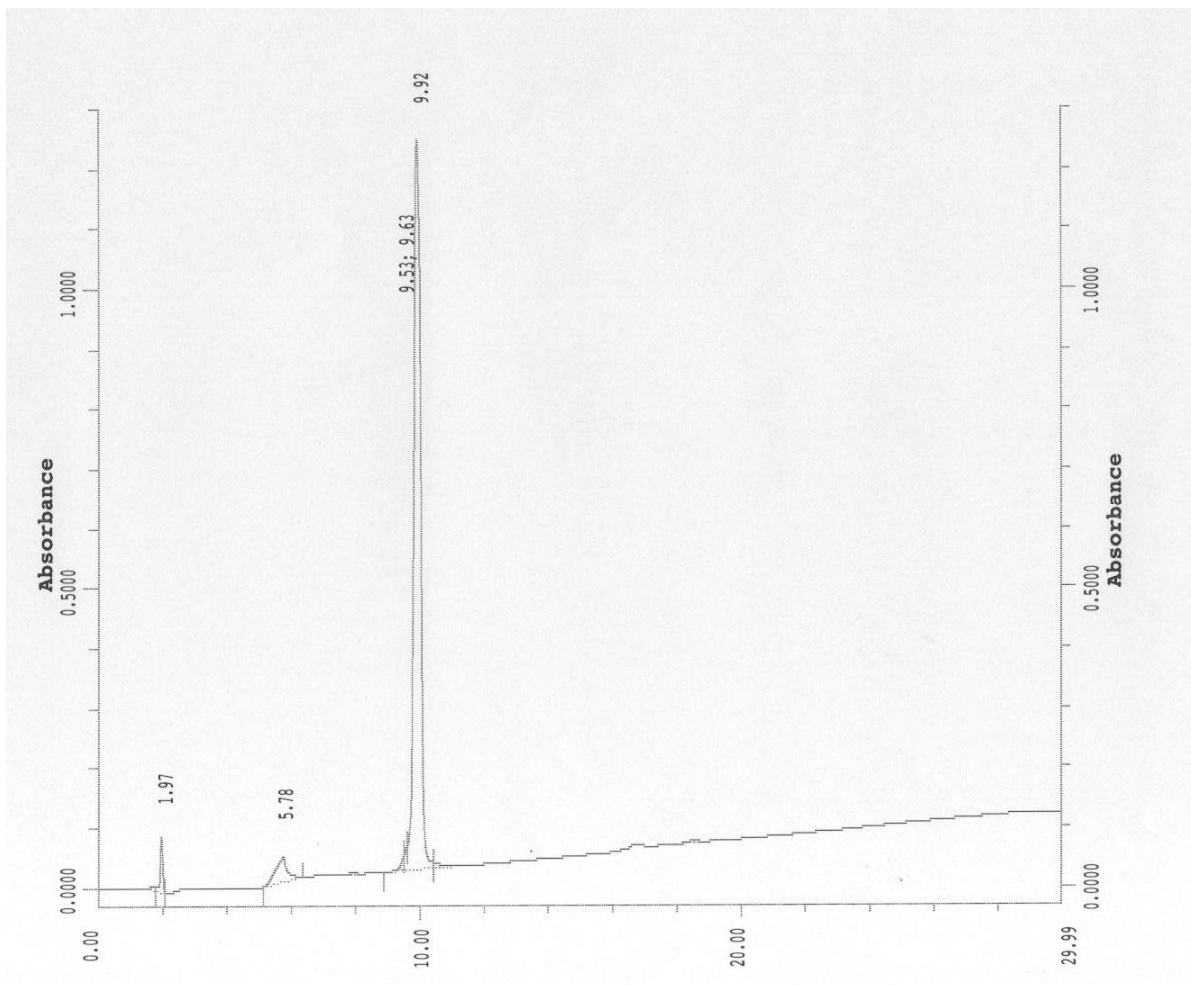

Compound 10

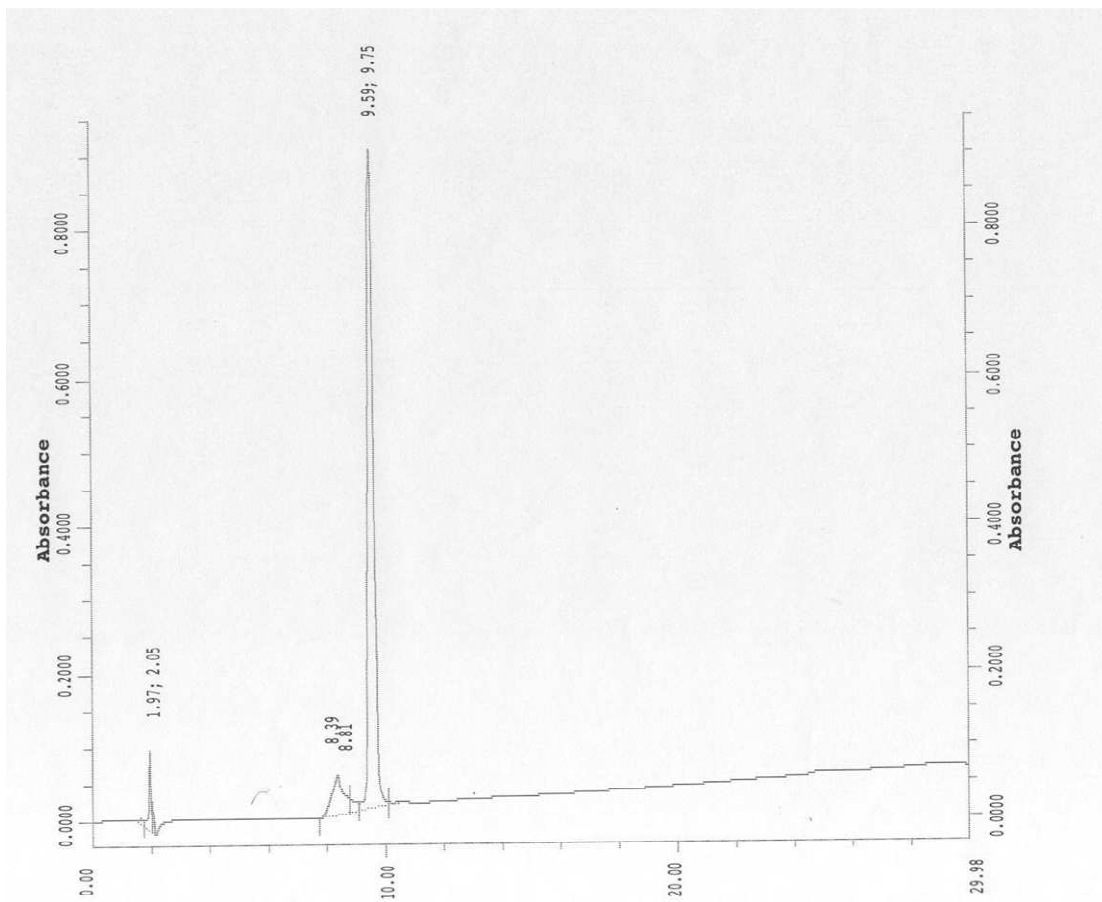

Compound 11

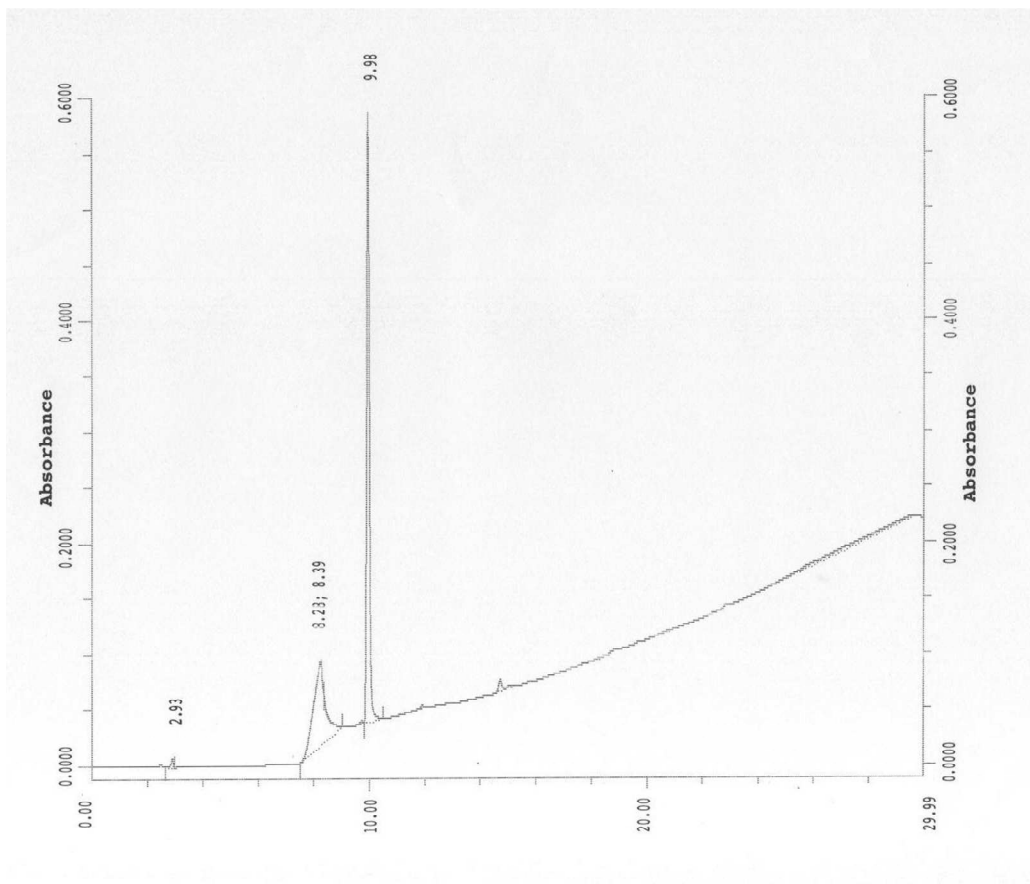

Compound 12



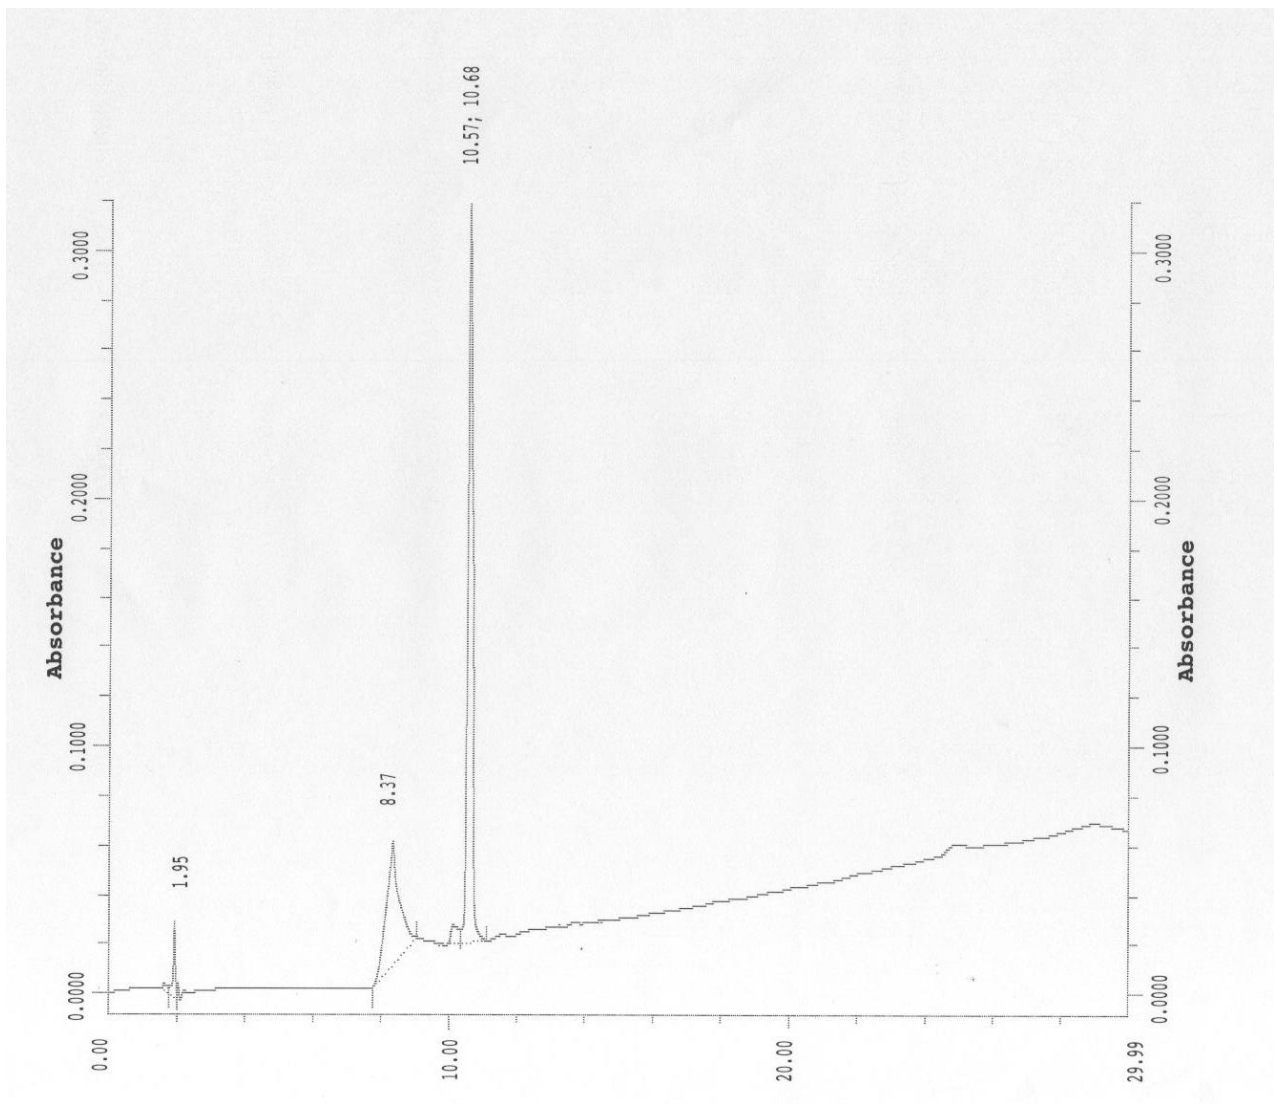

Compound 13

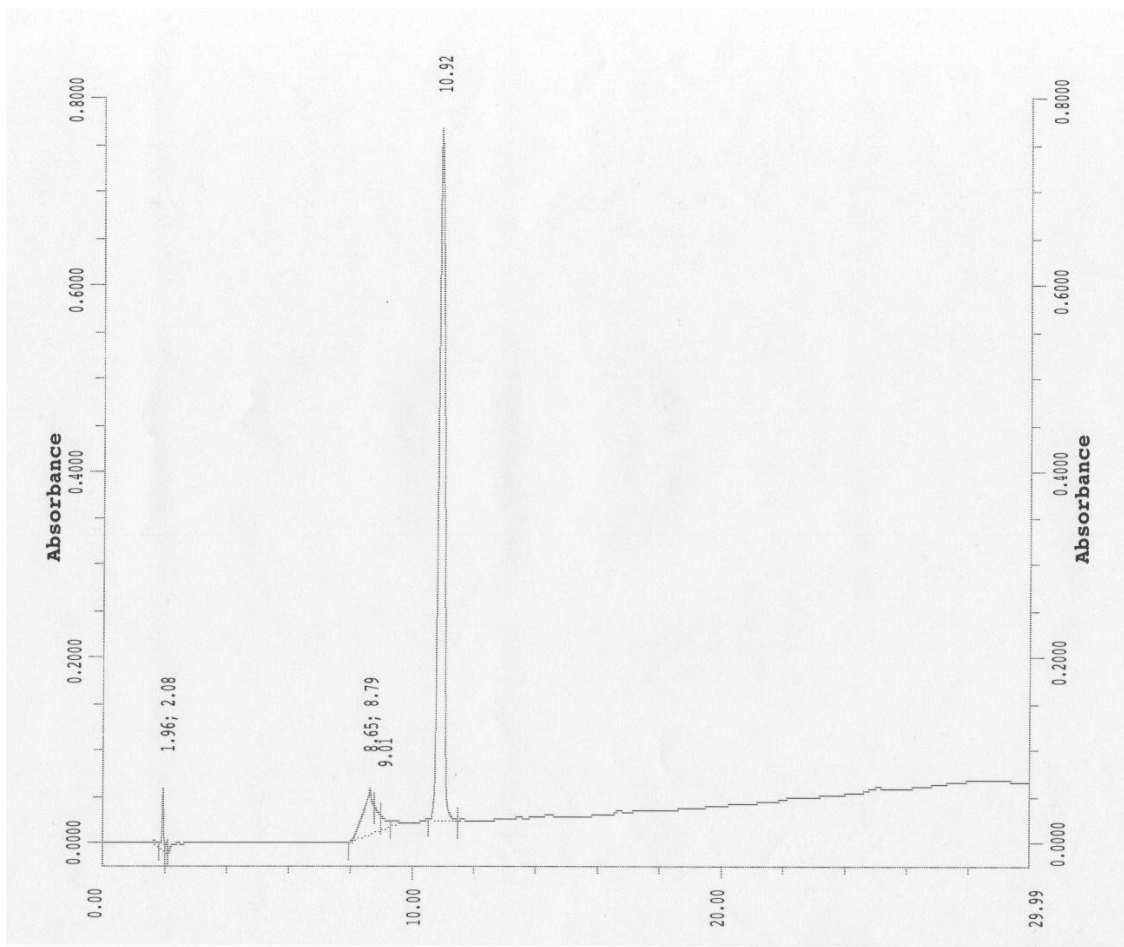

Compound 14

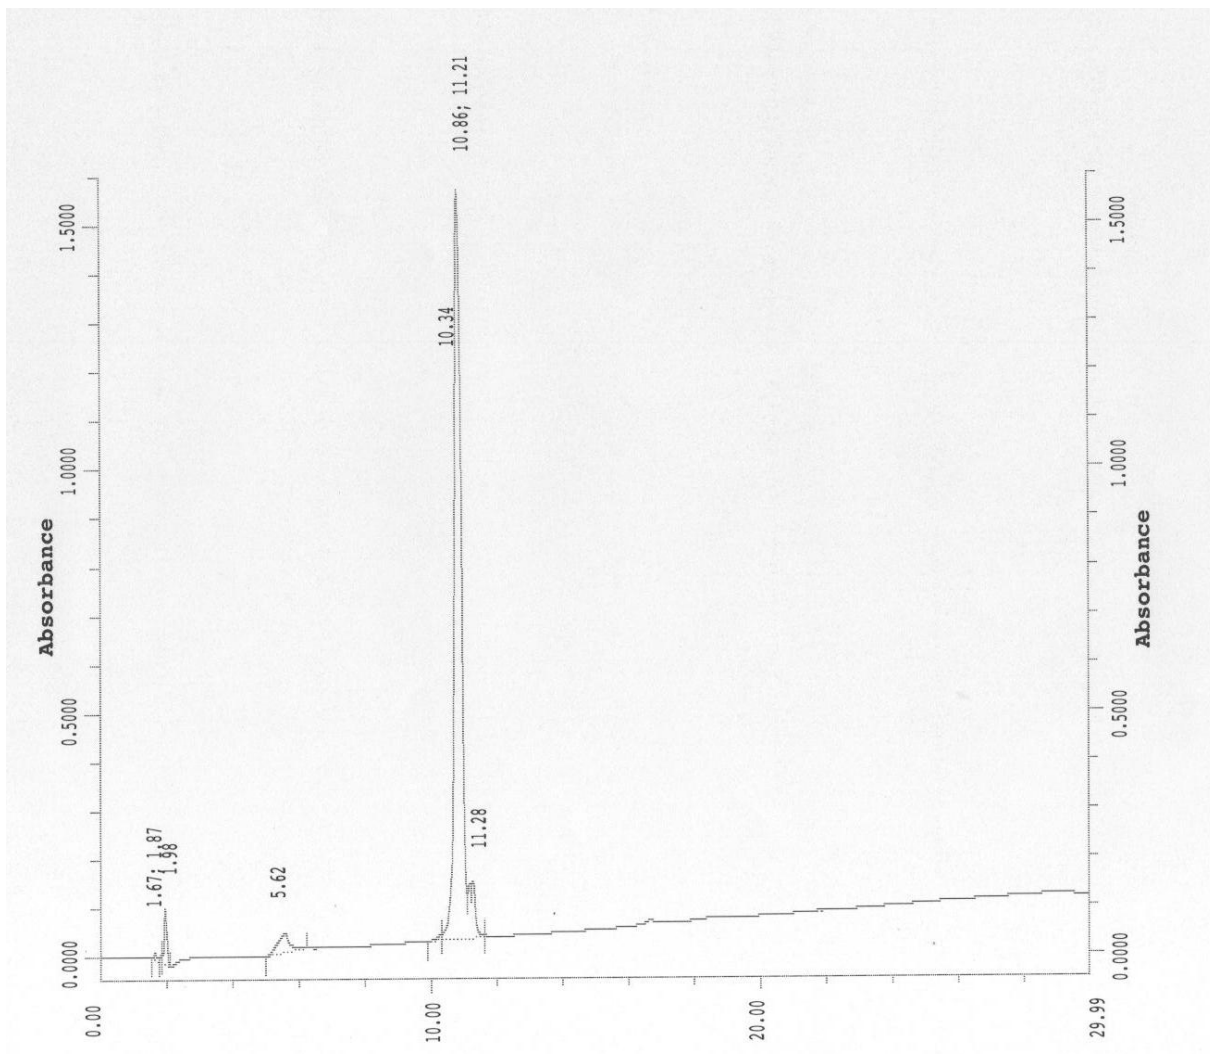

Compound 15

HPLC chromatograms of hNPS analogues (system II)

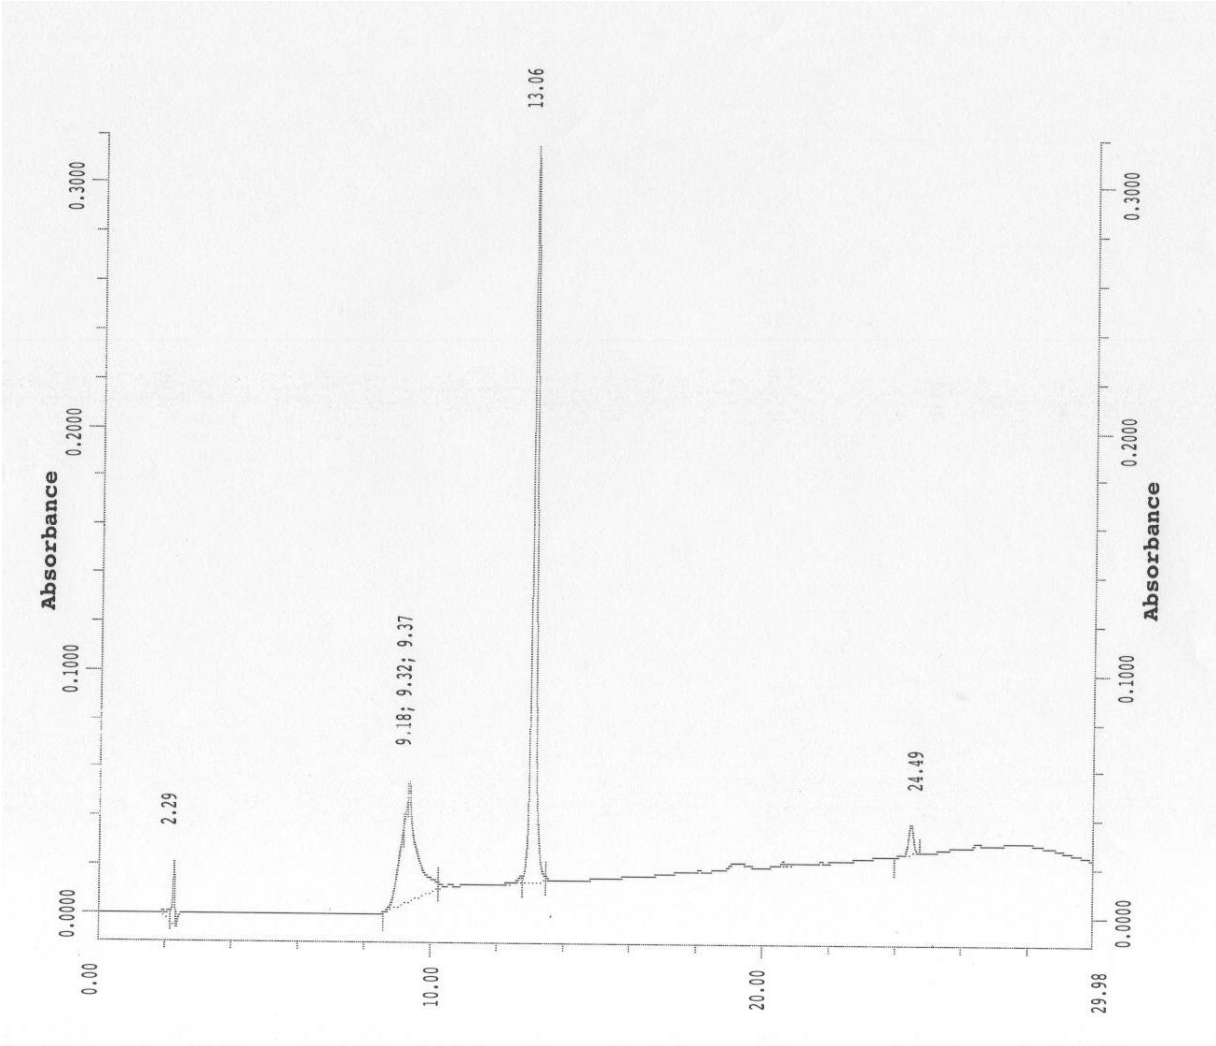

hNPS

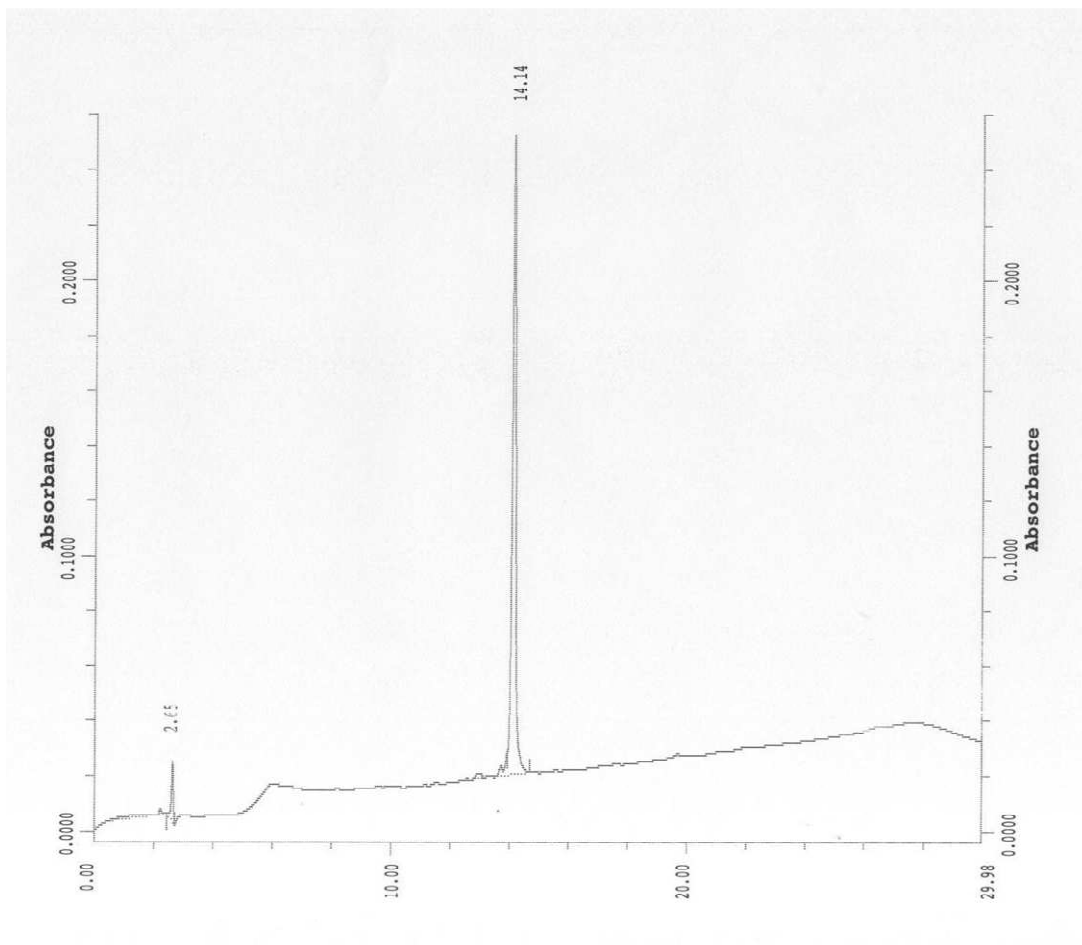

Compound 1

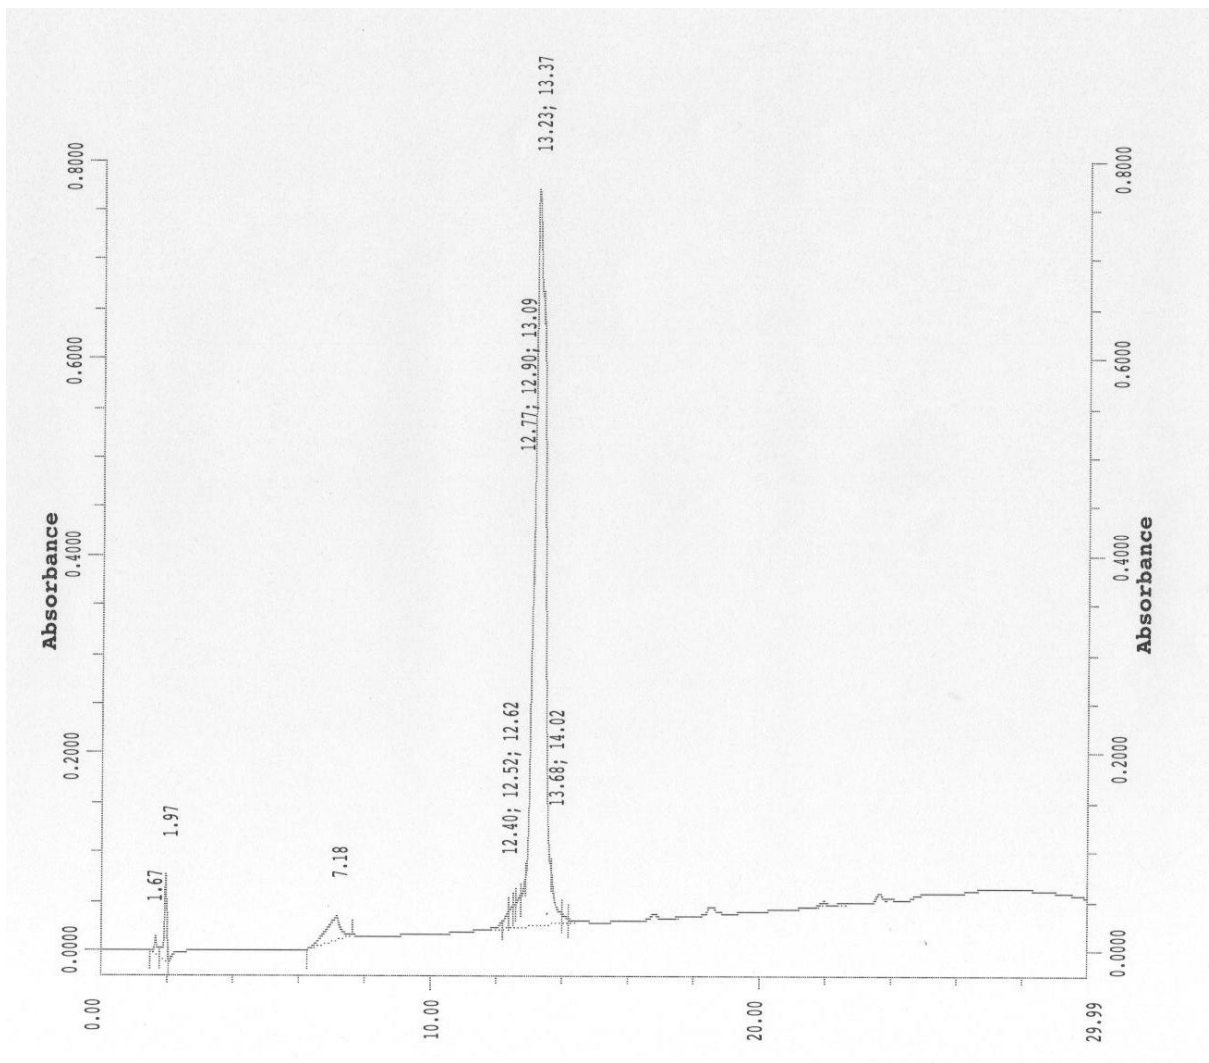

Compound 2

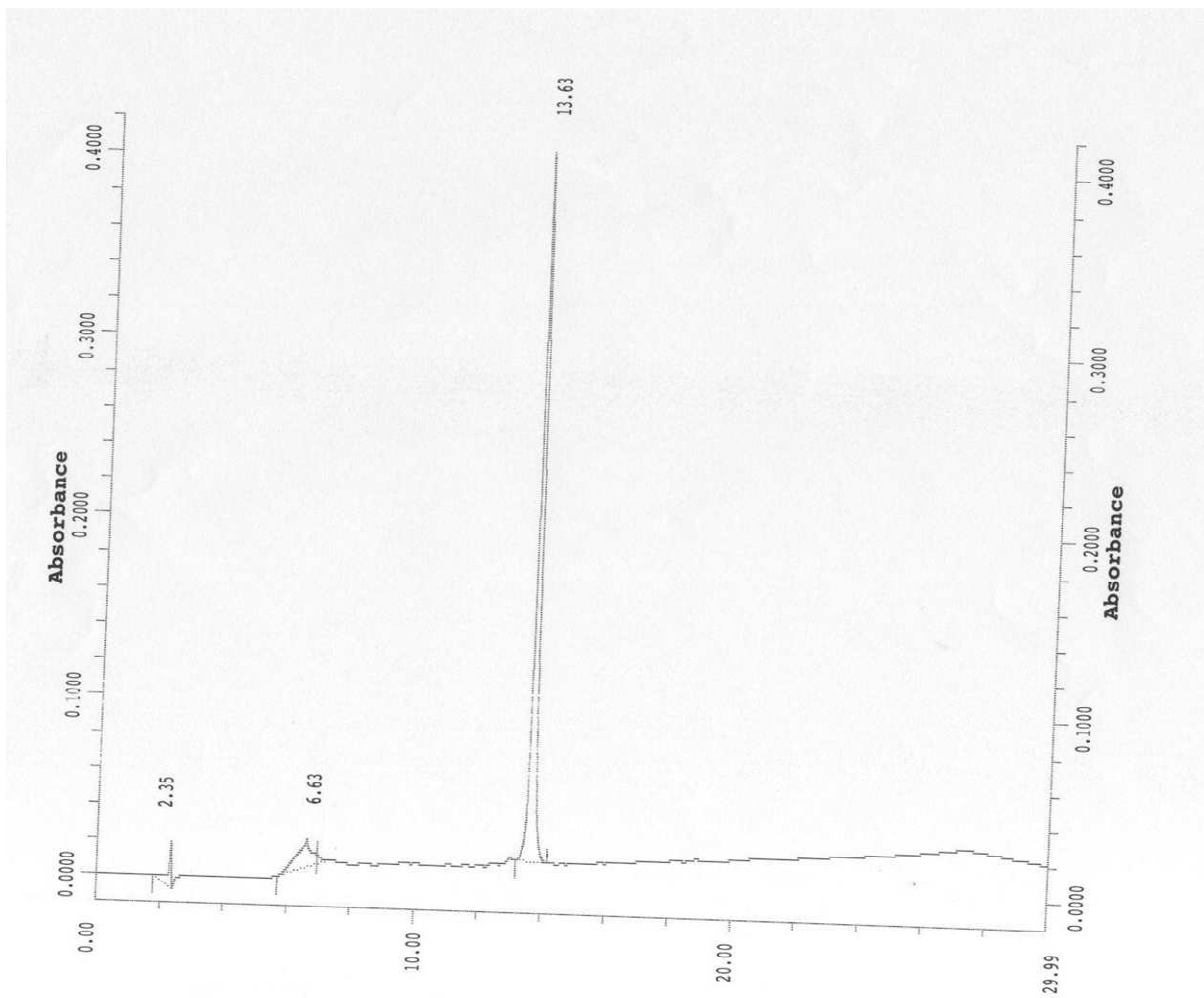

Compound 3

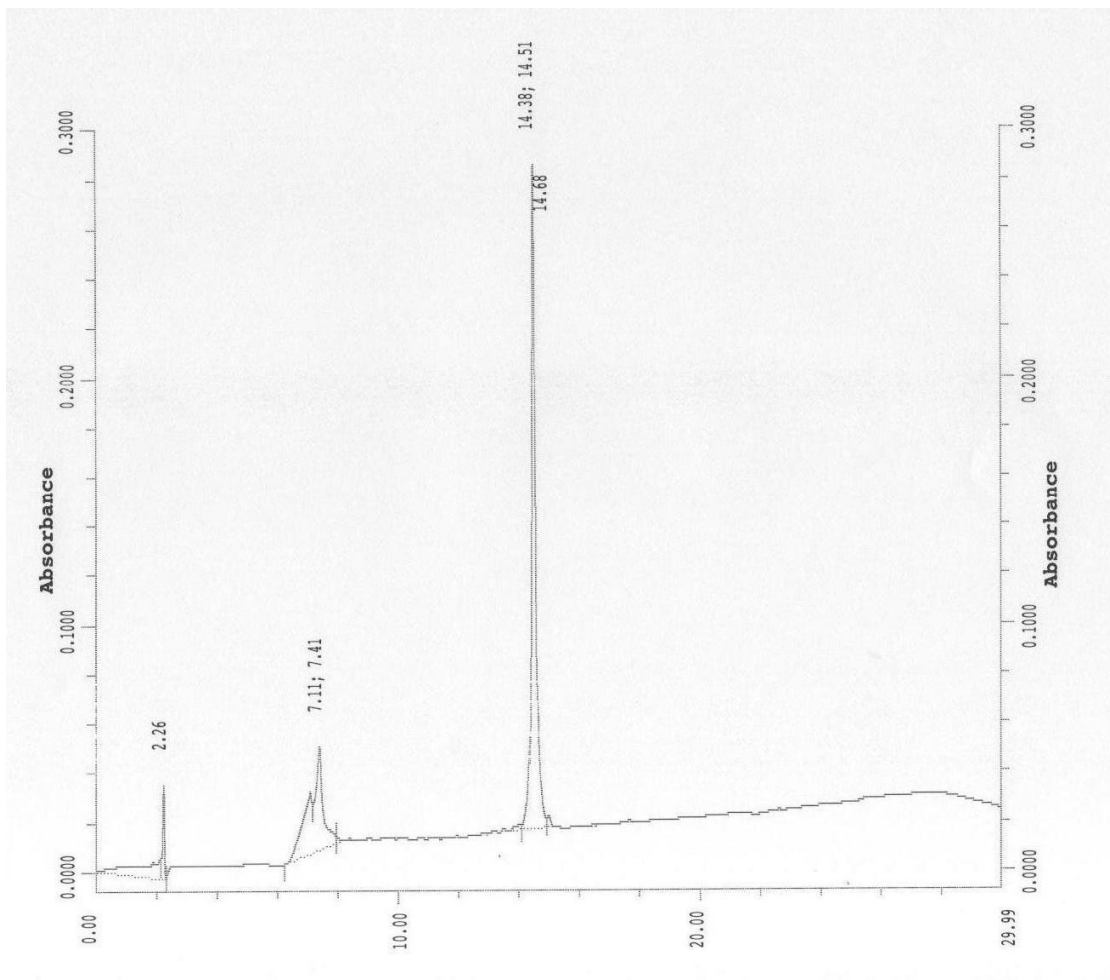

Compound 4



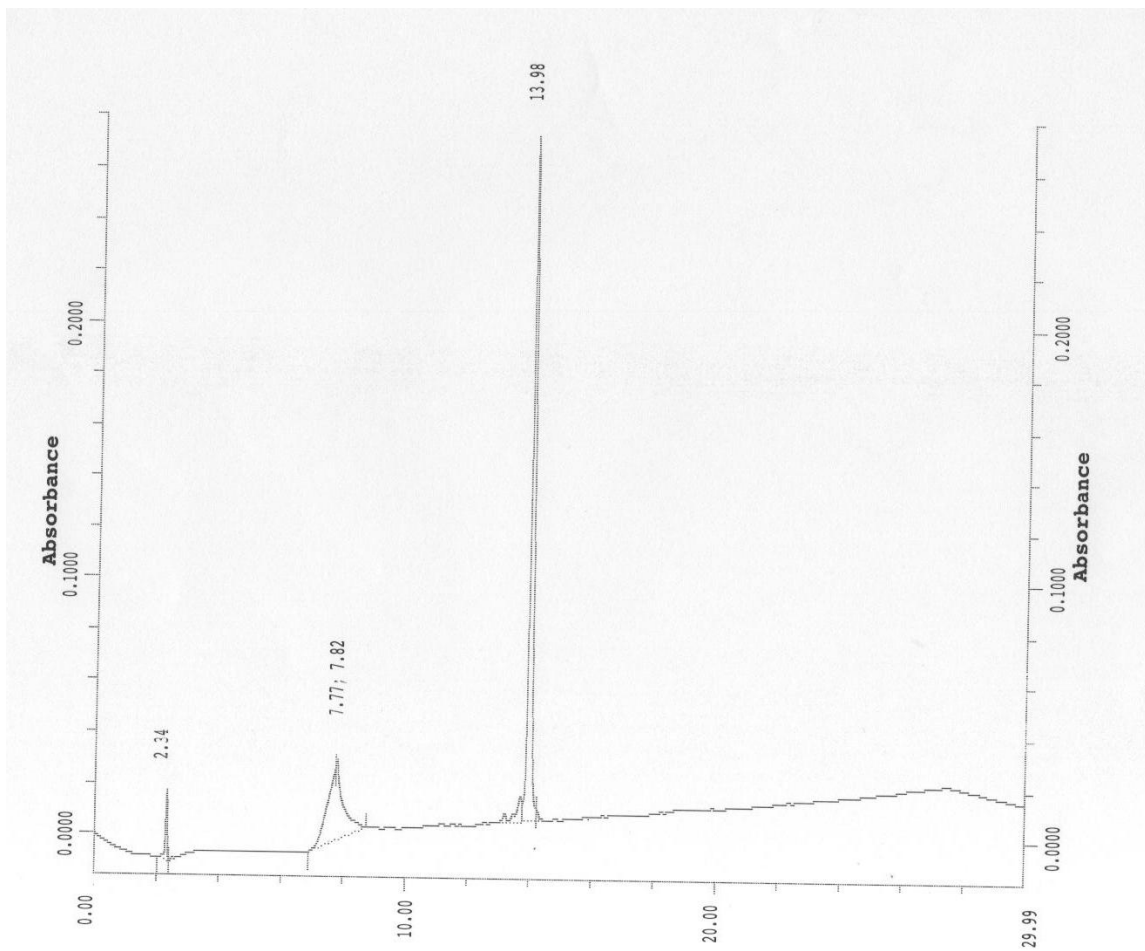

Compound 5

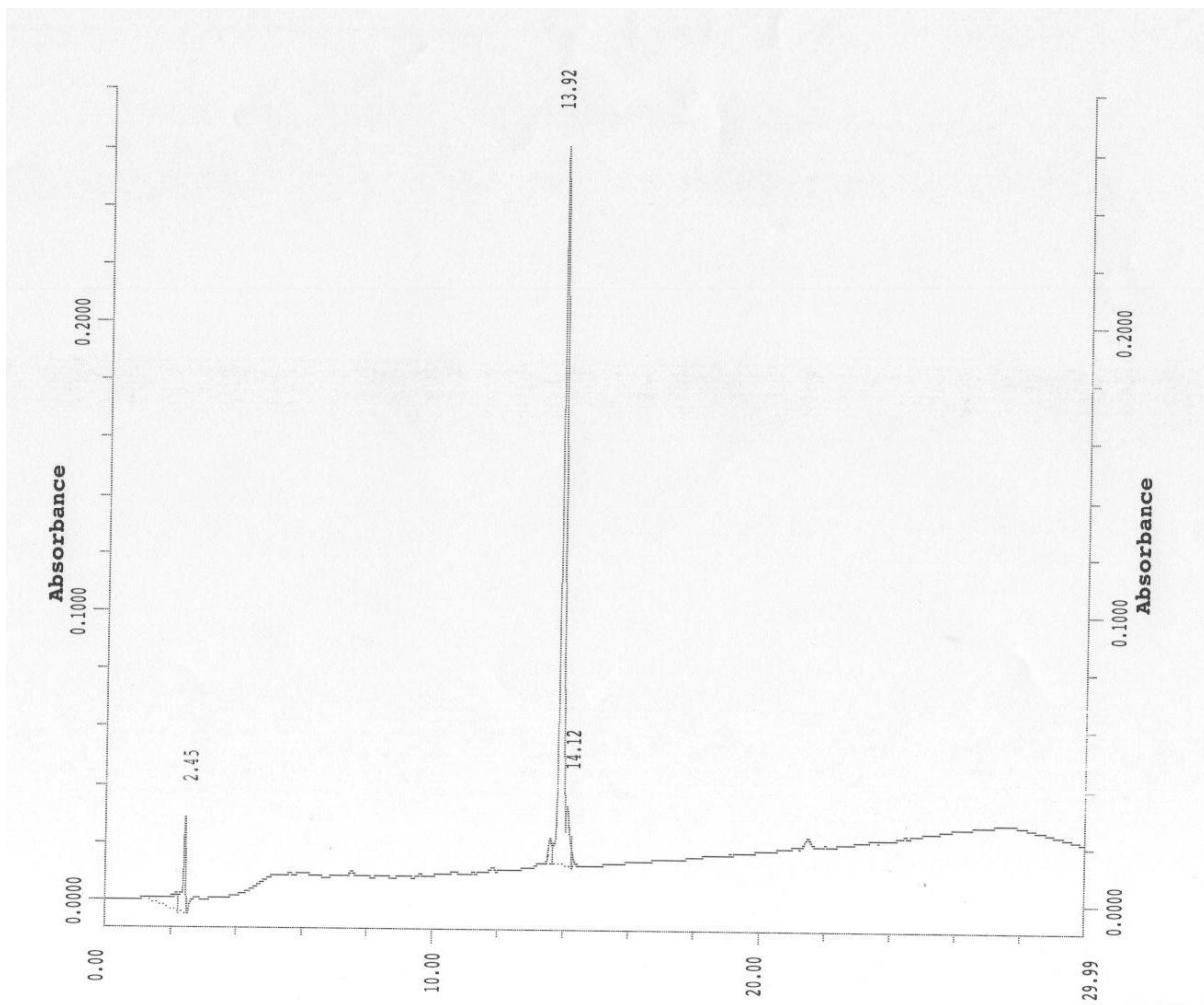

Compound 6

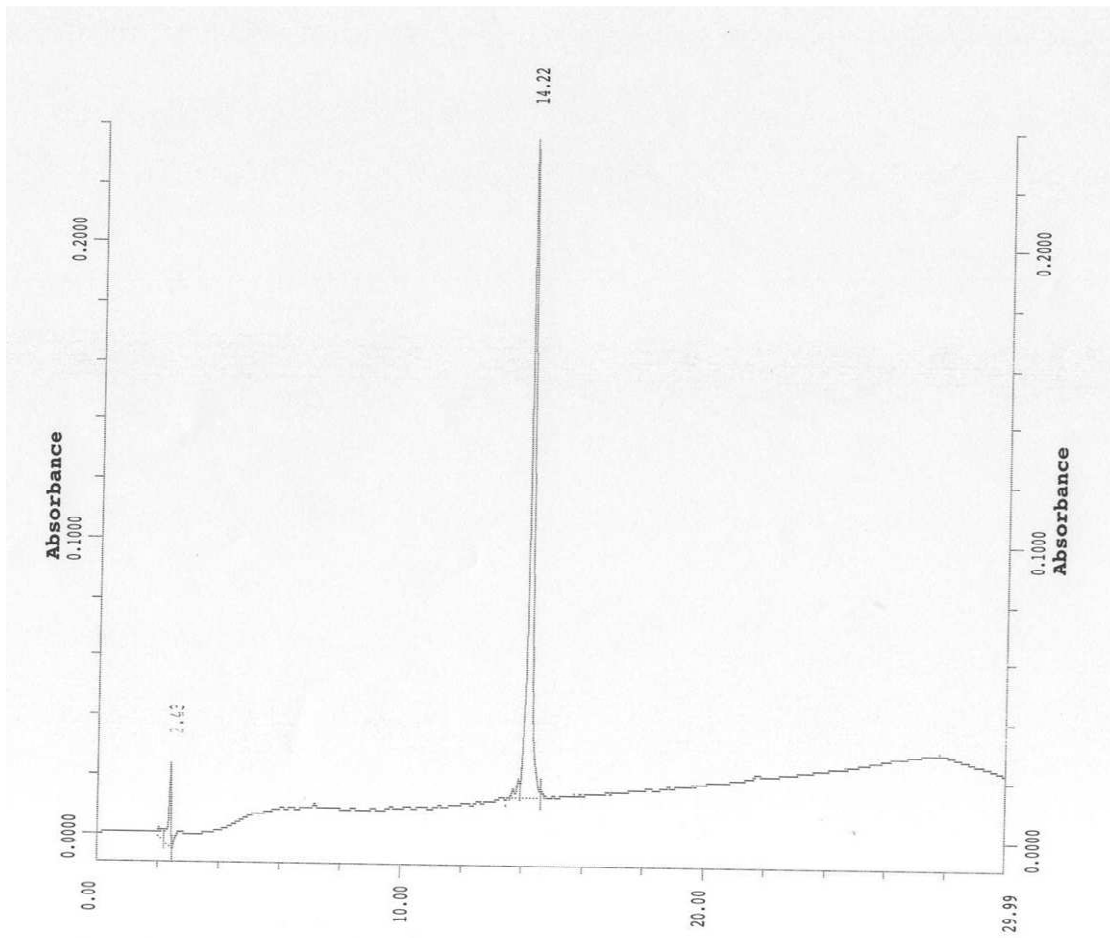

Compound 7

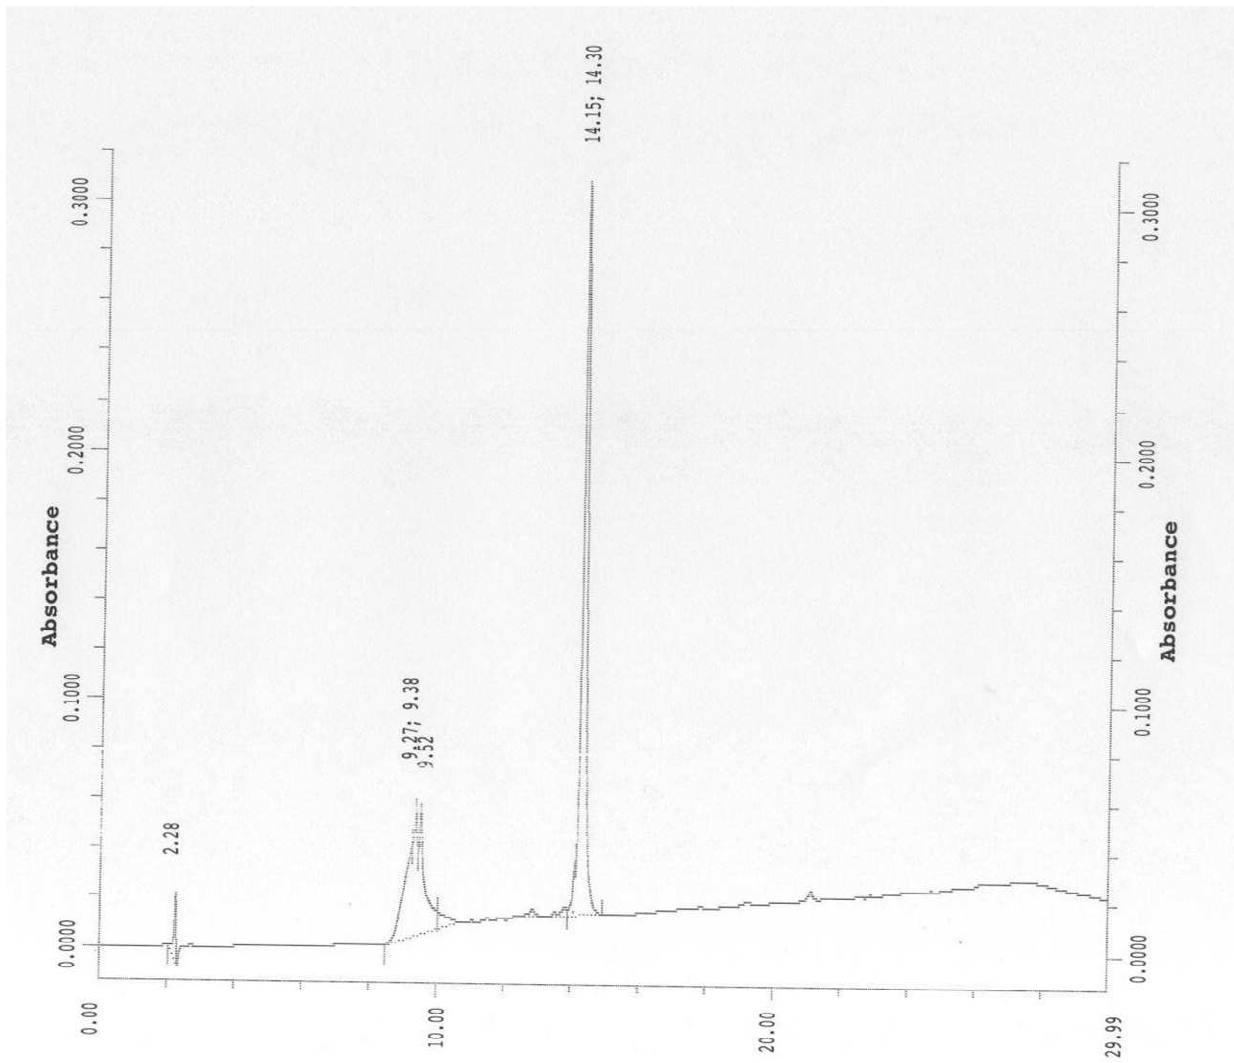

Compound 8

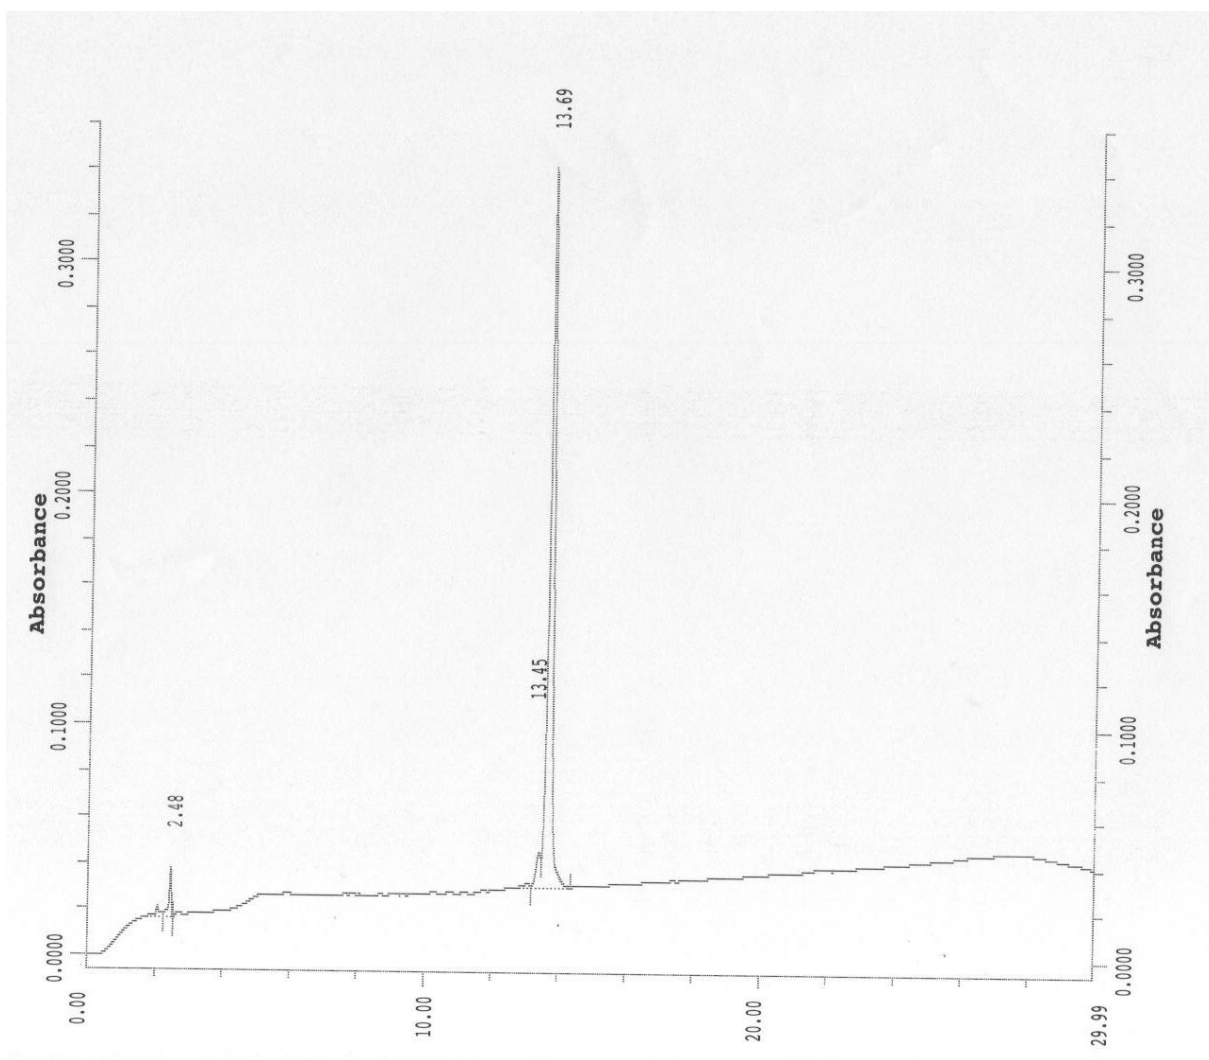

Compound 9

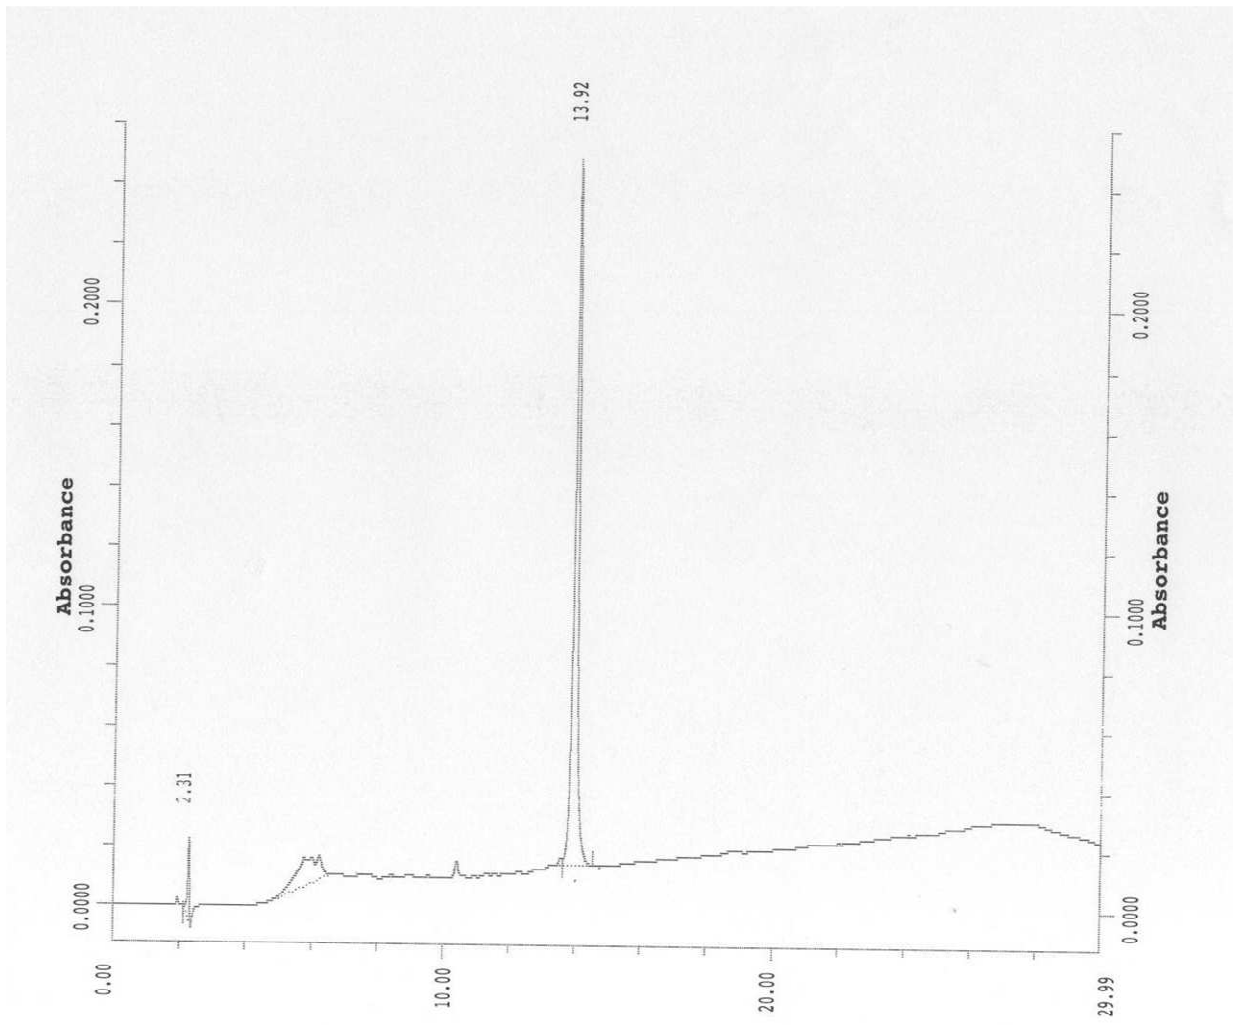

Compound 10

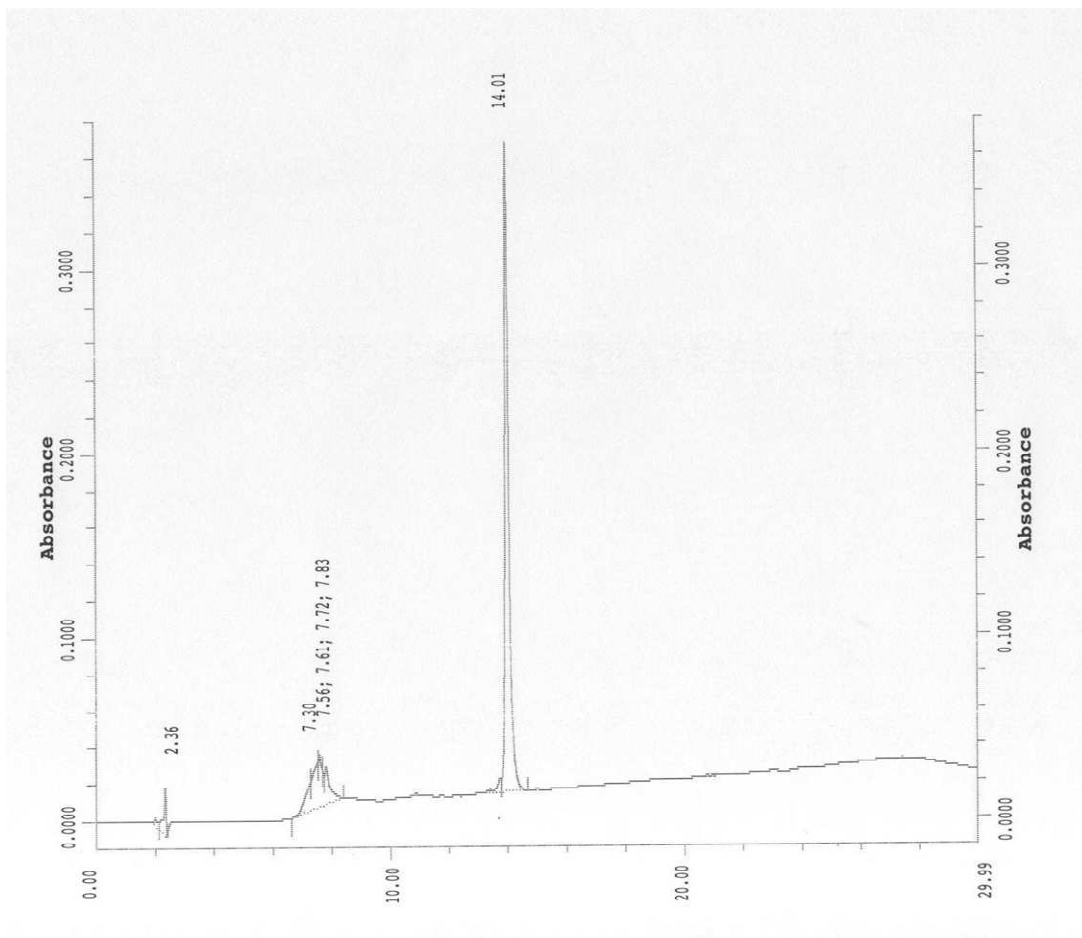

Compound 11

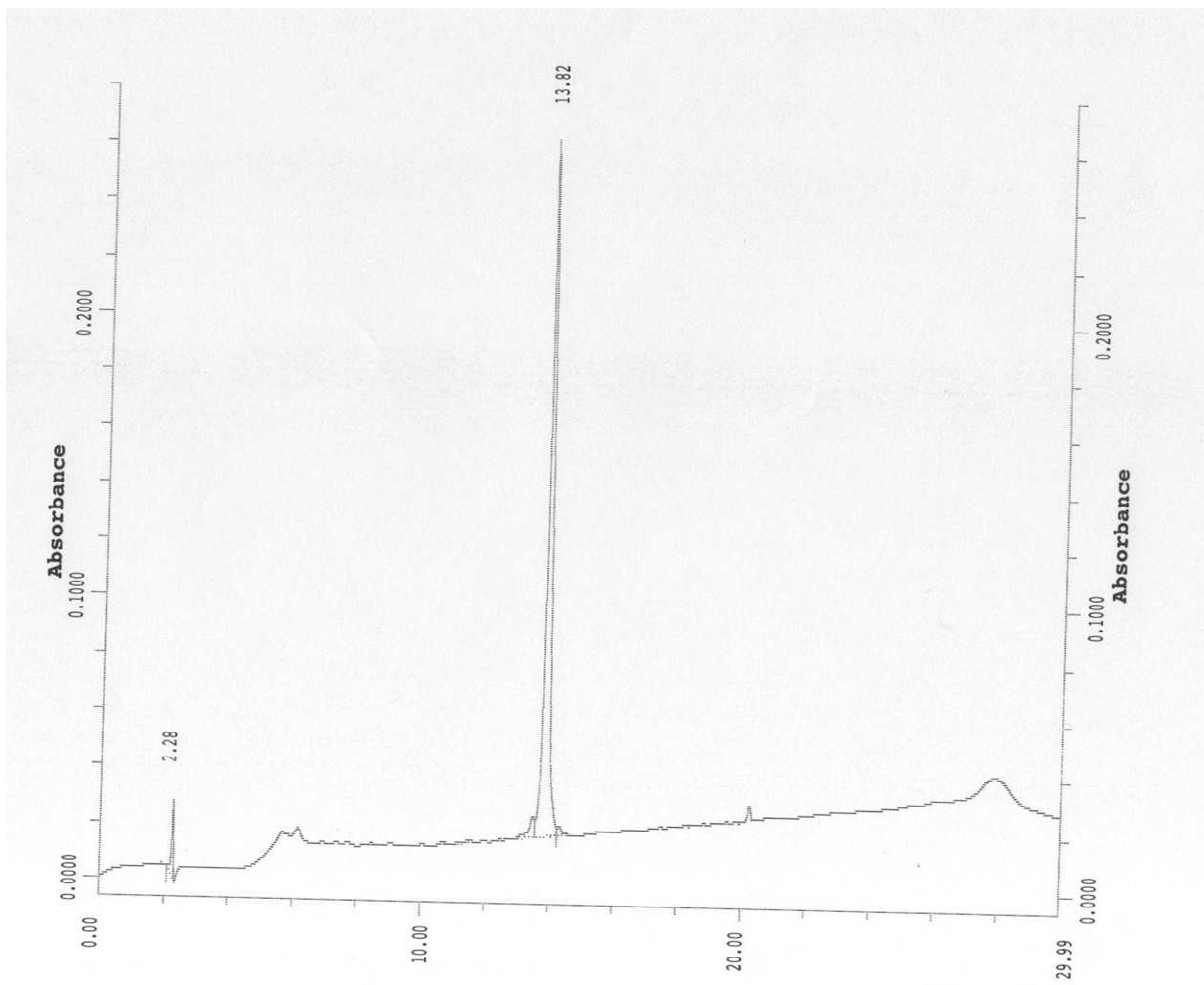

Compound 12



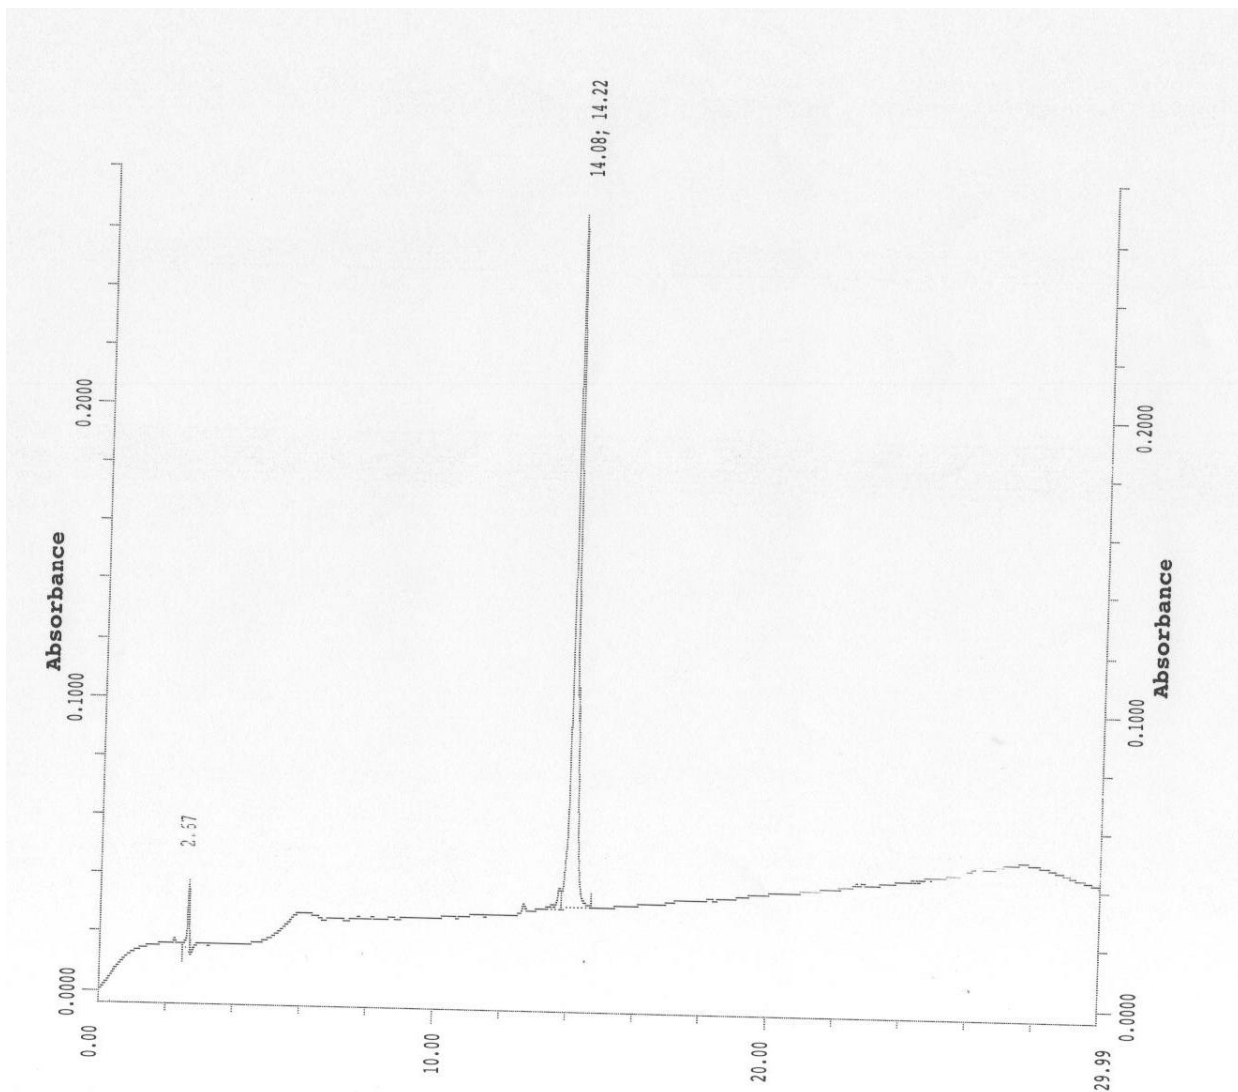

Compound 13

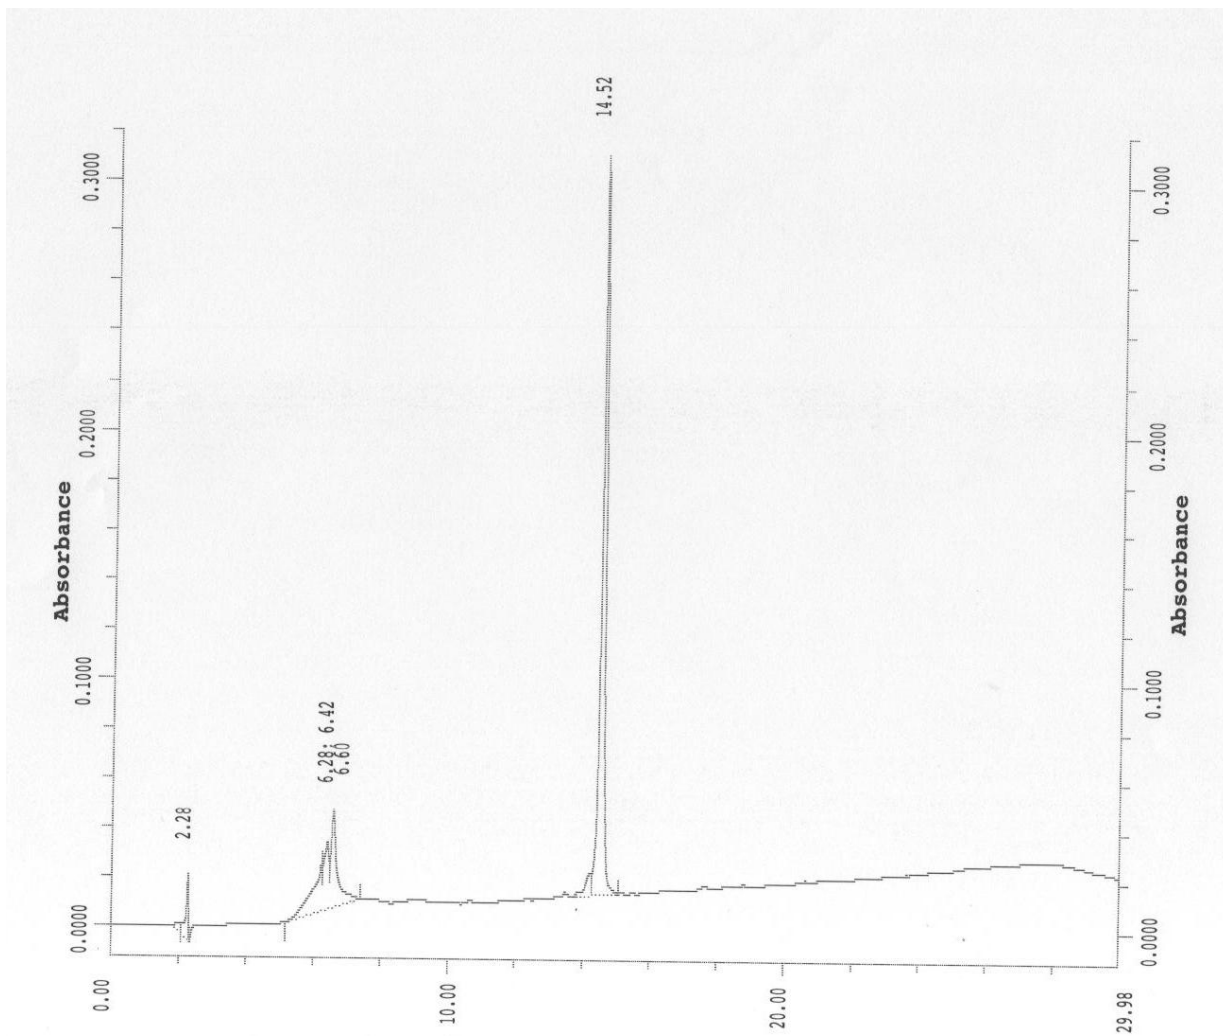

Compound 14

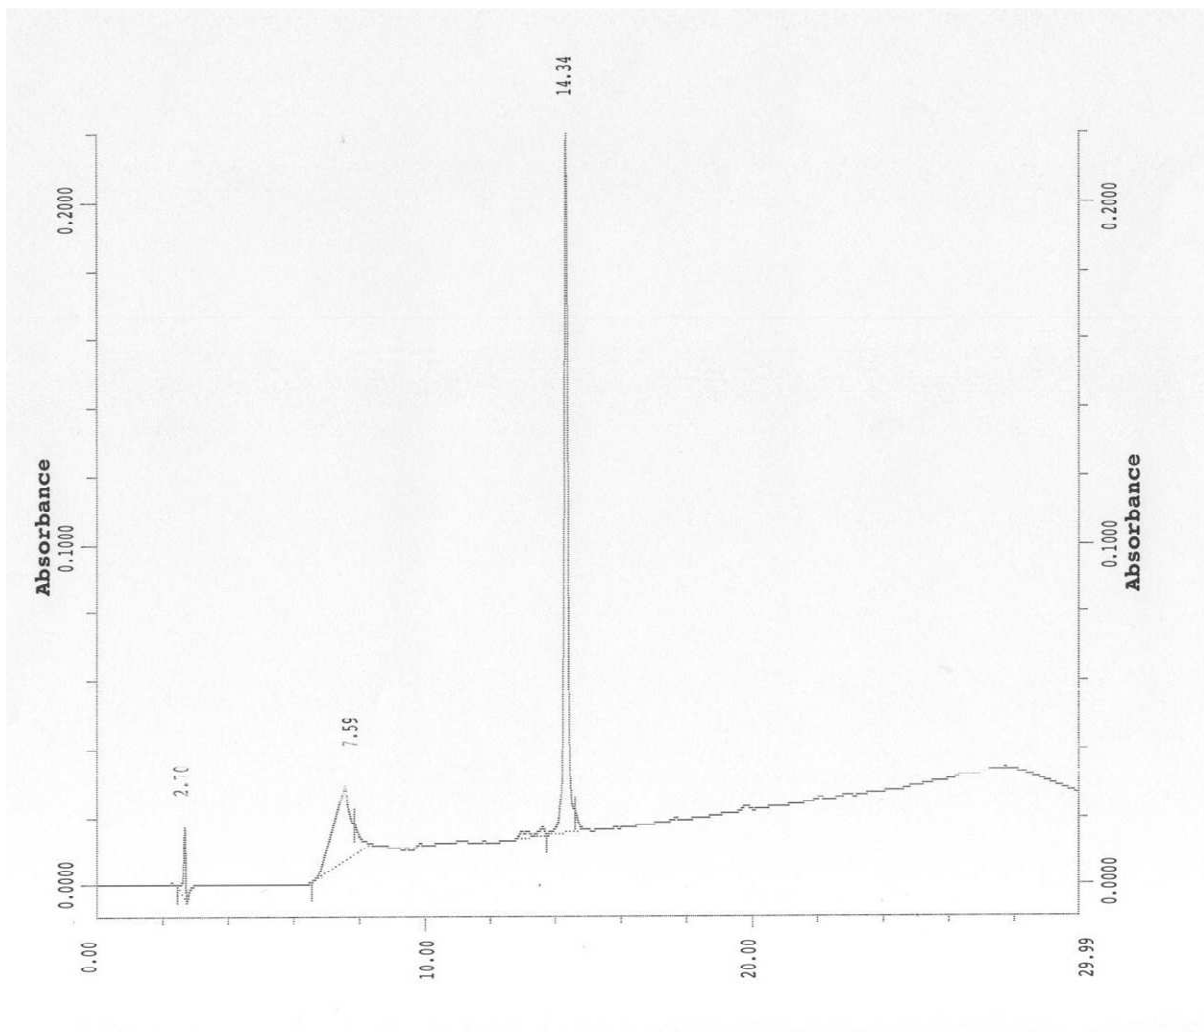

Compound 15
